# Supplementary material for: Fast synthesis of amides from ethyl salicylate under microwave radiation in a solvent-free system
Source: Royal Society of Chemistry journal article supplement (doi:10.1039/c7ra11434f), 2017-01-01
Supplement: c7ra11434f1.pdf [file c7ra11434f1.pdf]

## Supplementary Information

### Fast synthesis of amides from ethyl salicylate under microwave radiation and solvent-free system

Rafaely N. Lima<sup>a</sup>, Valdenizia R. Silva<sup>b</sup>, Luciano de S. Santos<sup>b</sup>, Daniel P. Bezerra<sup>b</sup>, Milena B. P. Soares<sup>b</sup>, André L. M. Porto<sup>a\*</sup>

<sup>a</sup>Laboratório de Química Orgânica e Biocatálise, Instituto de Química de São Carlos, Universidade de São Paulo, Av. João Dagnone, 1100, Ed. Química Ambiental, Santa Angelina, 13563-120, São Carlos-SP, Brazil. Tel.: +55 16 33738103; Fax: + 55 16 33739952; e-mail: alporto@iqsc.usp.br\*.

<sup>b</sup>Fundação Oswaldo Cruz, Centro de Pesquisas Gonçalo Moniz, R. Waldemar Falcão, 121, 40296-710, Candeal, Salvador-BA, Brazil.

#### Summary

1. Chromatograms, GC-MS, FTIR and NMR data for the amides **S-Aa** to **S-Aj** ..... 1
2. Analytical curve of ethyl salicylate **ES** ..... 22
3. References ..... 22

#### 1. Chromatograms, GC-MS, FTIR and NMR data for the amides **S-Aa** to **S-Aj**

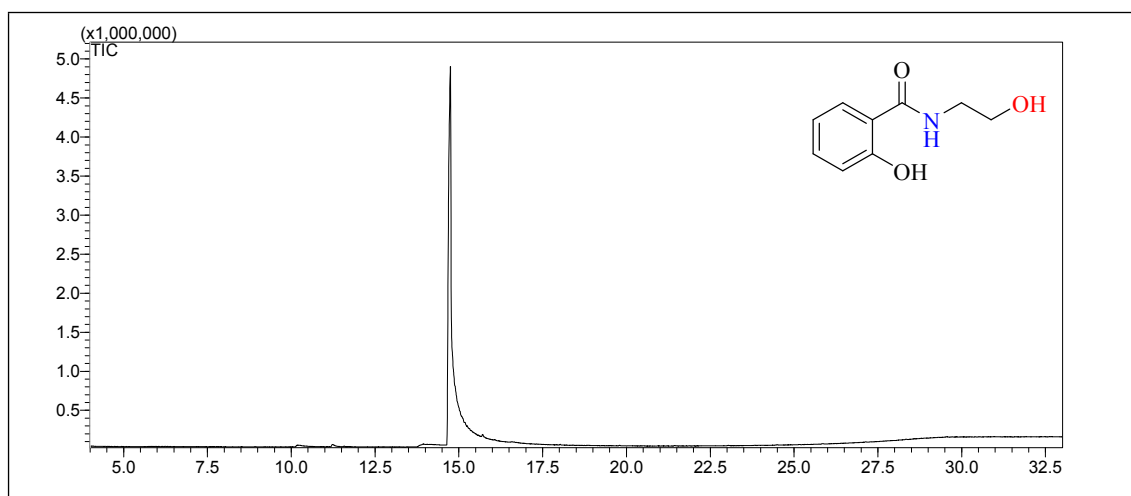

**Figure S1.** Chromatogram obtained by GC-MS (EI, 70 eV) of 2-hydroxy-N-(2-hydroxyethyl)benzamide (**S-Aa**).

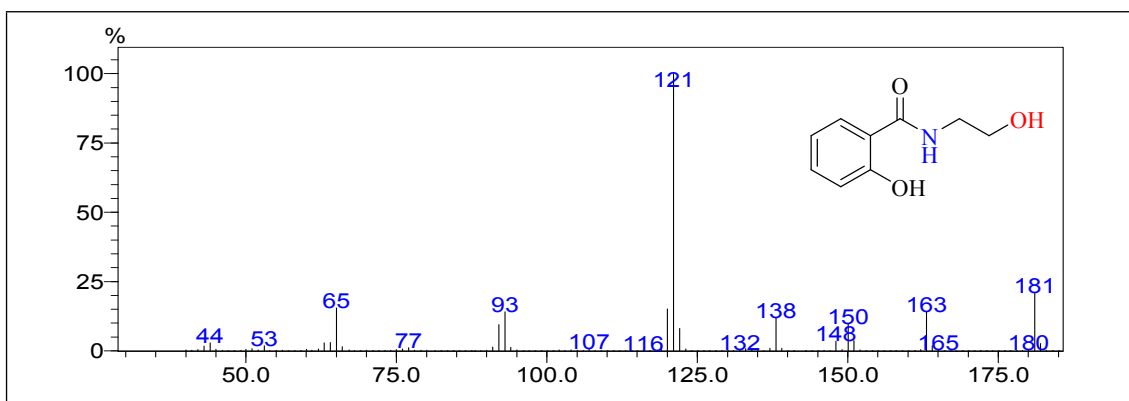

**Figure S2.** Mass spectrum (EI, 70 eV) of 2-hydroxy-N-(2-hydroxyethyl)benzamide (S-Aa).

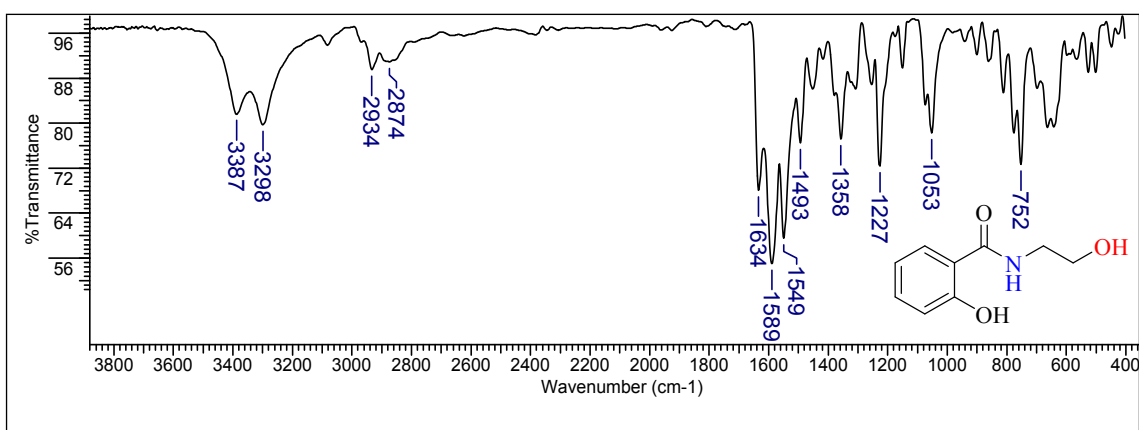

**Figure S3.** FTIR spectrum (silicon plate) of 2-hydroxy-N-(2-hydroxyethyl)benzamide (S-Aa).

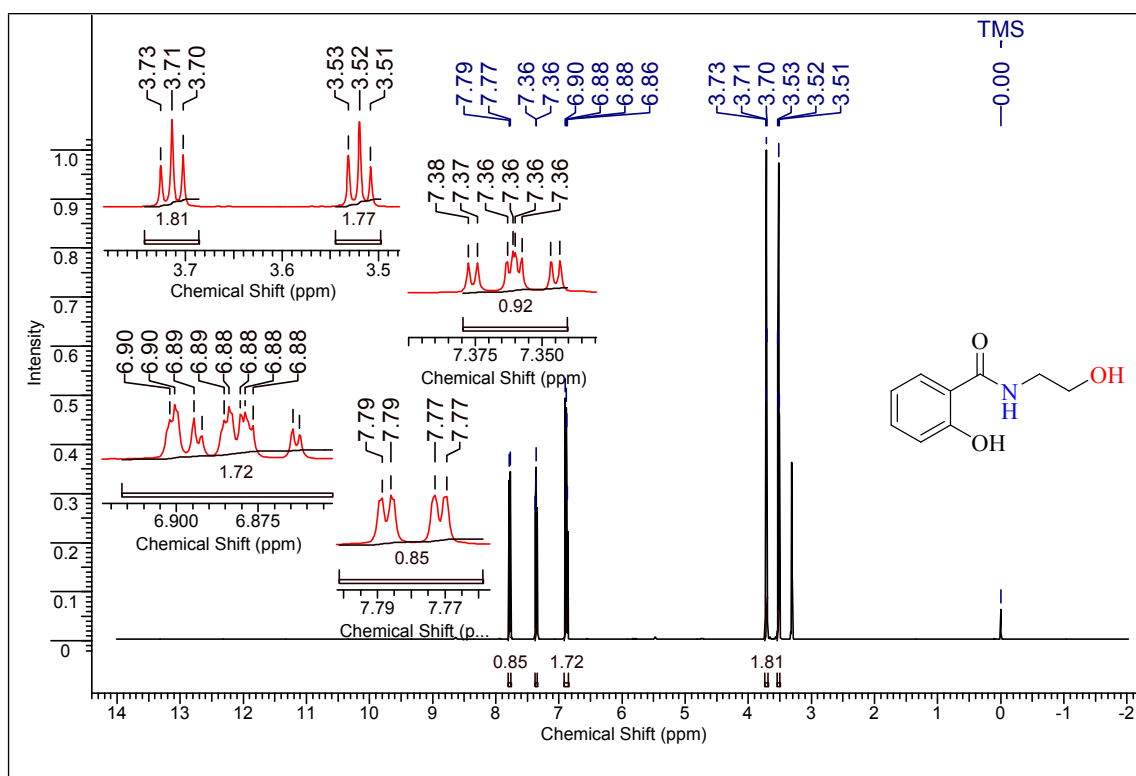

**Figure S4.** <sup>1</sup>H NMR spectrum (400 MHz, CD<sub>3</sub>OD) of 2-hydroxy-*N*-(2-hydroxyethyl)benzamide (S-Aa).

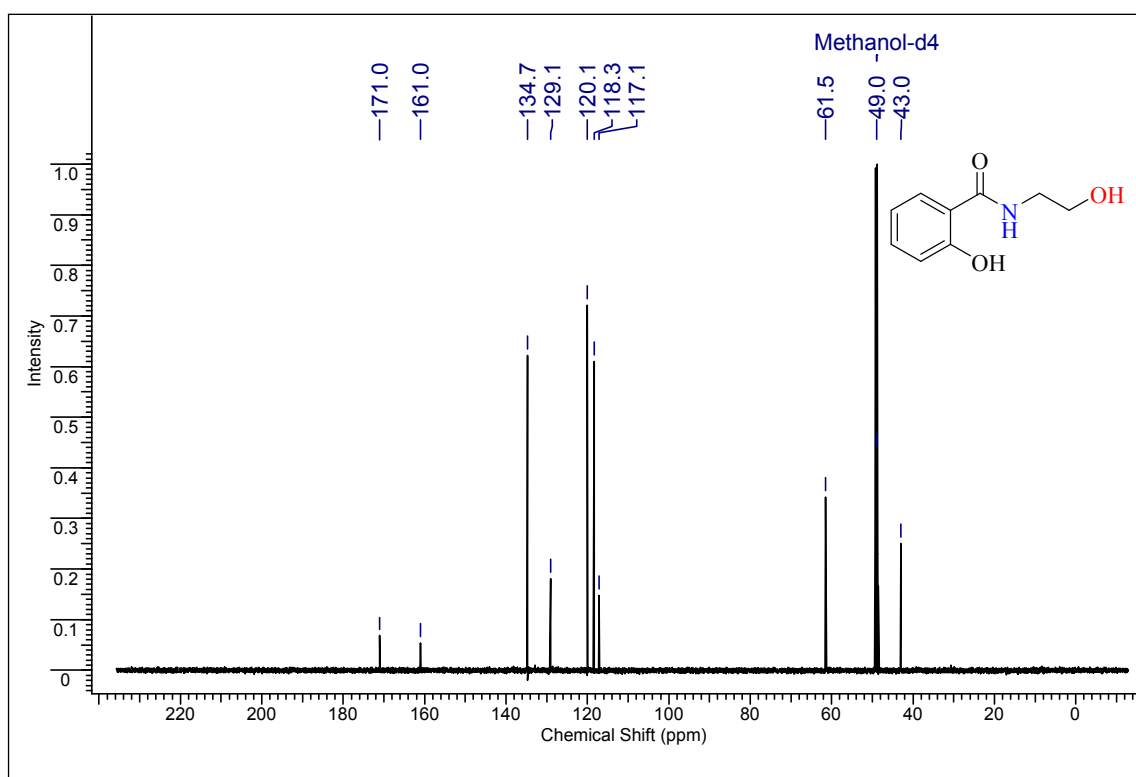

**Figure S5.** <sup>13</sup>C NMR spectrum (126 MHz, CD<sub>3</sub>OD) of 2-hydroxy-*N*-(2-hydroxyethyl)benzamide (S-Aa).

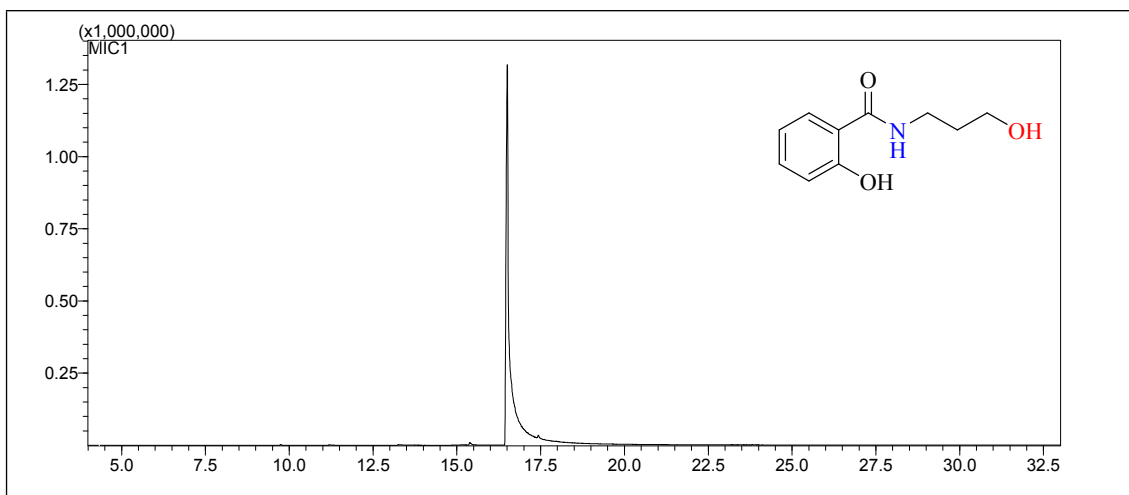

**Figure S6.** Chromatogram obtained by GC-MS (EI, 70 eV) of 2-hydroxy-*N*-(3-hydroxypropyl)benzamide (**S-Ab**).

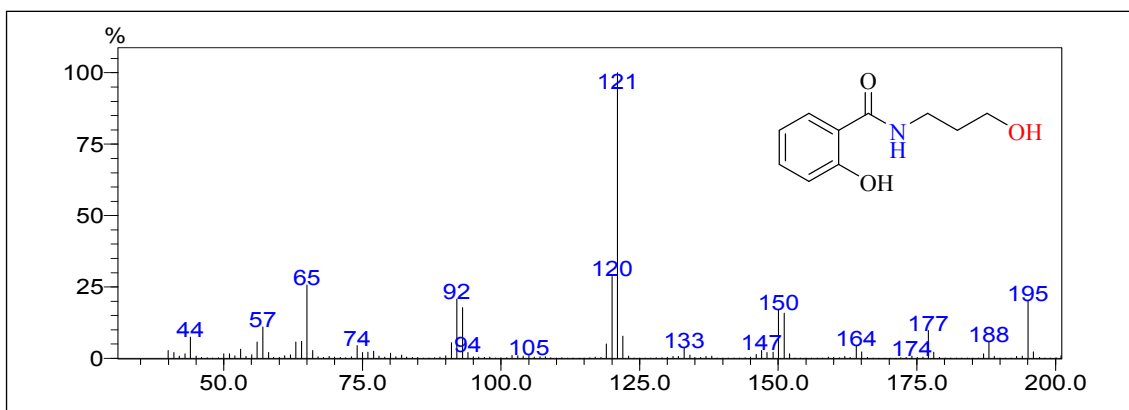

**Figure S7.** Mass spectrum (EI, 70 eV) of 2-hydroxy-*N*-(3-hydroxypropyl)benzamide (**S-Ab**).

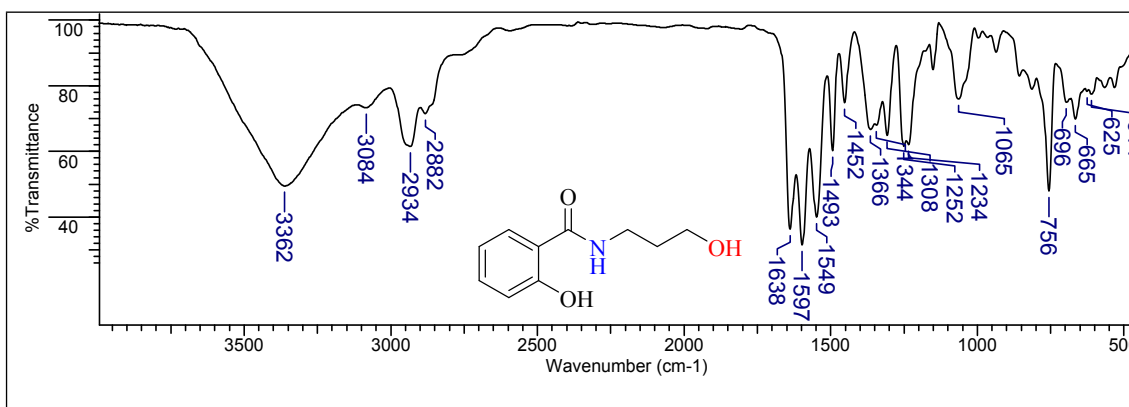

**Figure S8.** FTIR spectrum (silicon plate) of 2-hydroxy-*N*-(3-hydroxypropyl)benzamide (**S-Ab**).

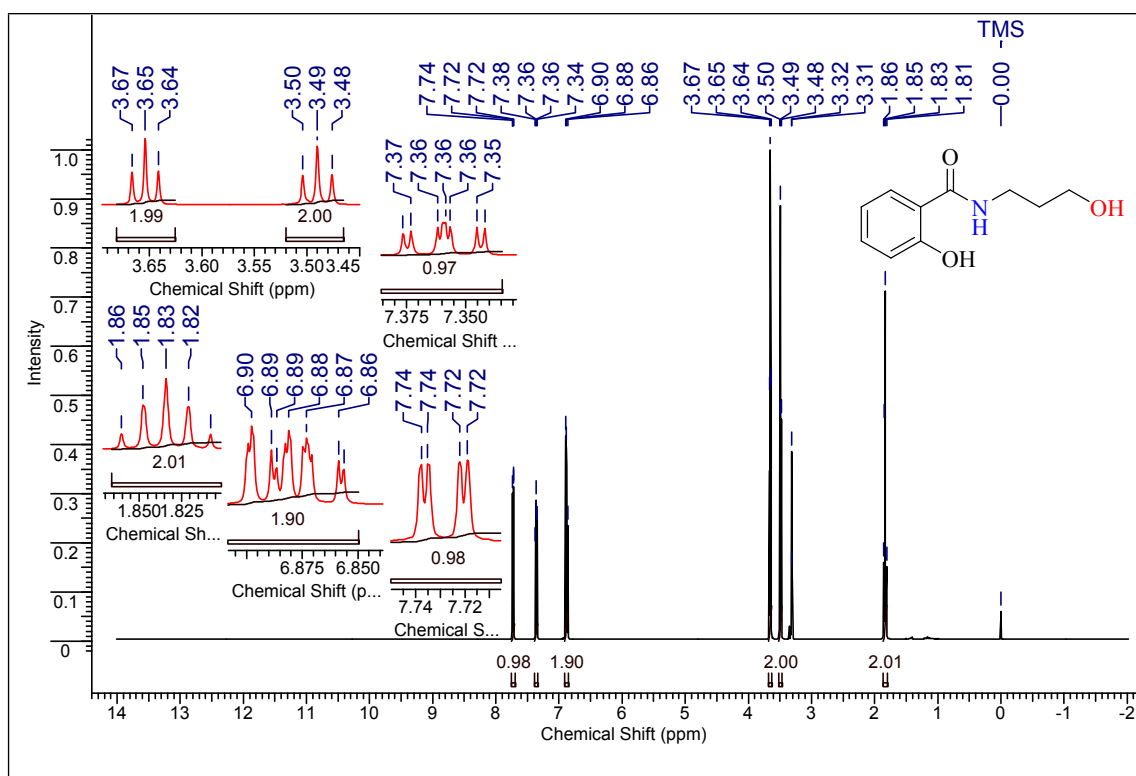

**Figure S9.**  $^1\text{H}$  NMR spectrum (400 MHz,  $\text{CD}_3\text{OD}$ ) of 2-hydroxy-*N*-(3-hydroxypropyl)benzamide (S-Ab).

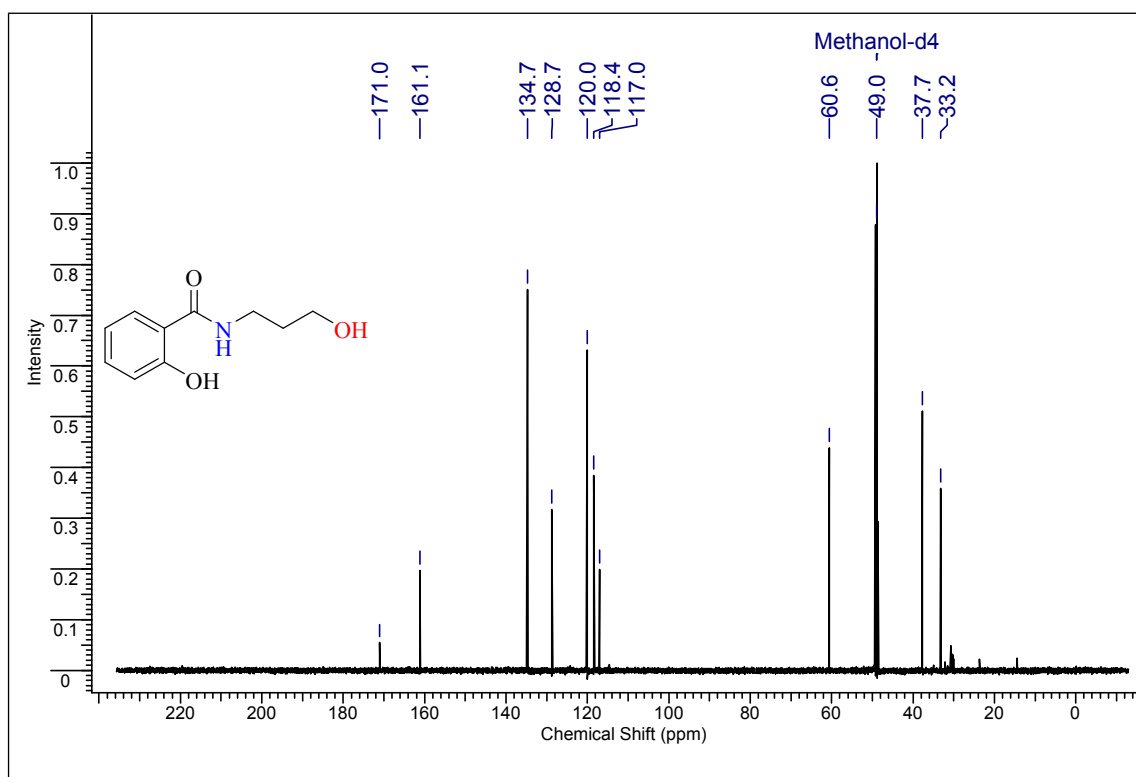

**Figure S10.**  $^{13}\text{C}$  NMR spectrum (400 MHz,  $\text{CD}_3\text{OD}$ ) of 2-hydroxy-*N*-(3-hydroxypropyl)benzamide (S-Ab).

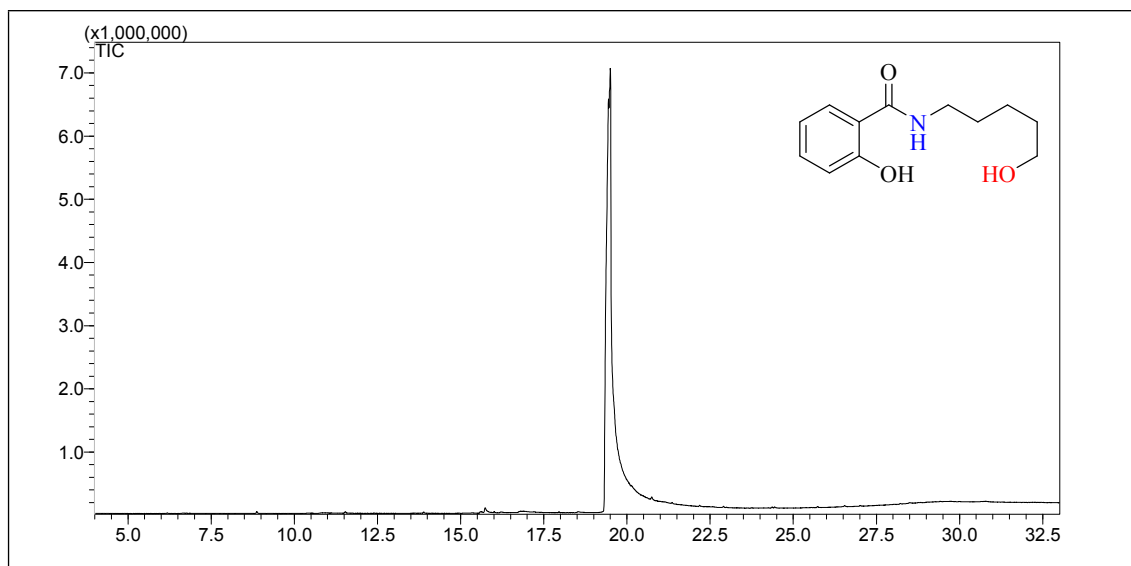

**Figure S11.** Chromatogram obtained by GC-MS (EI, 70 eV) of 2-hydroxy-*N*-(5-hydroxypentyl)benzamide (**S-Ac**).

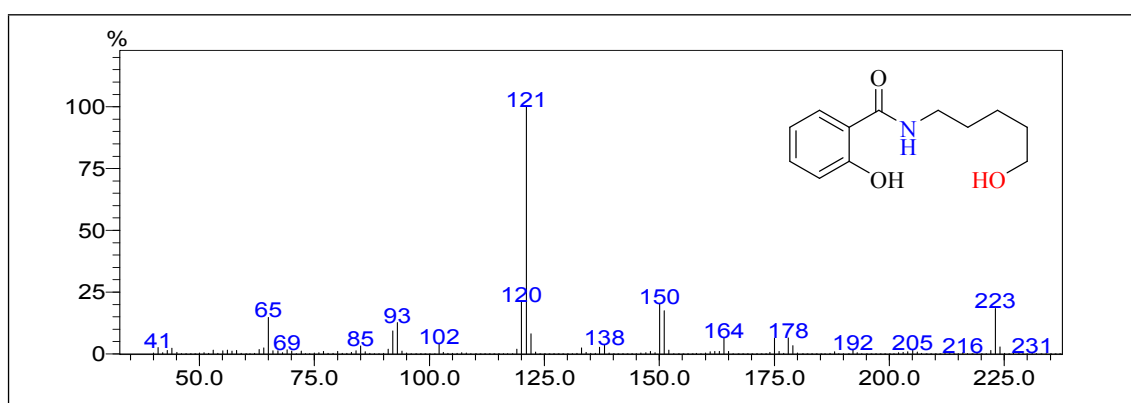

**Figure S12.** Mass spectrum (EI, 70 eV) of 2-hydroxy-*N*-(5-hydroxypentyl)benzamide (**S-Ac**).

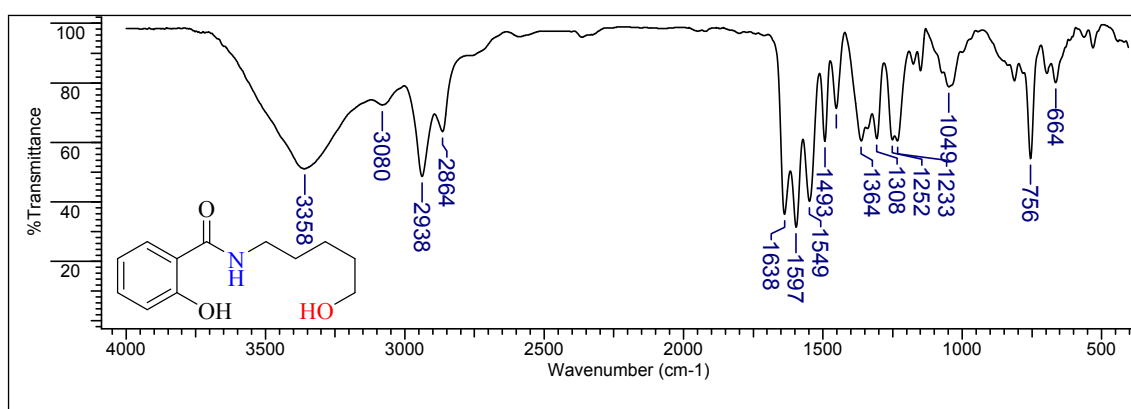

**Figure S13.** FTIR spectrum (silicon plate) of 2-hydroxy-*N*-(5-hydroxypentyl)benzamide (**S-Ac**).

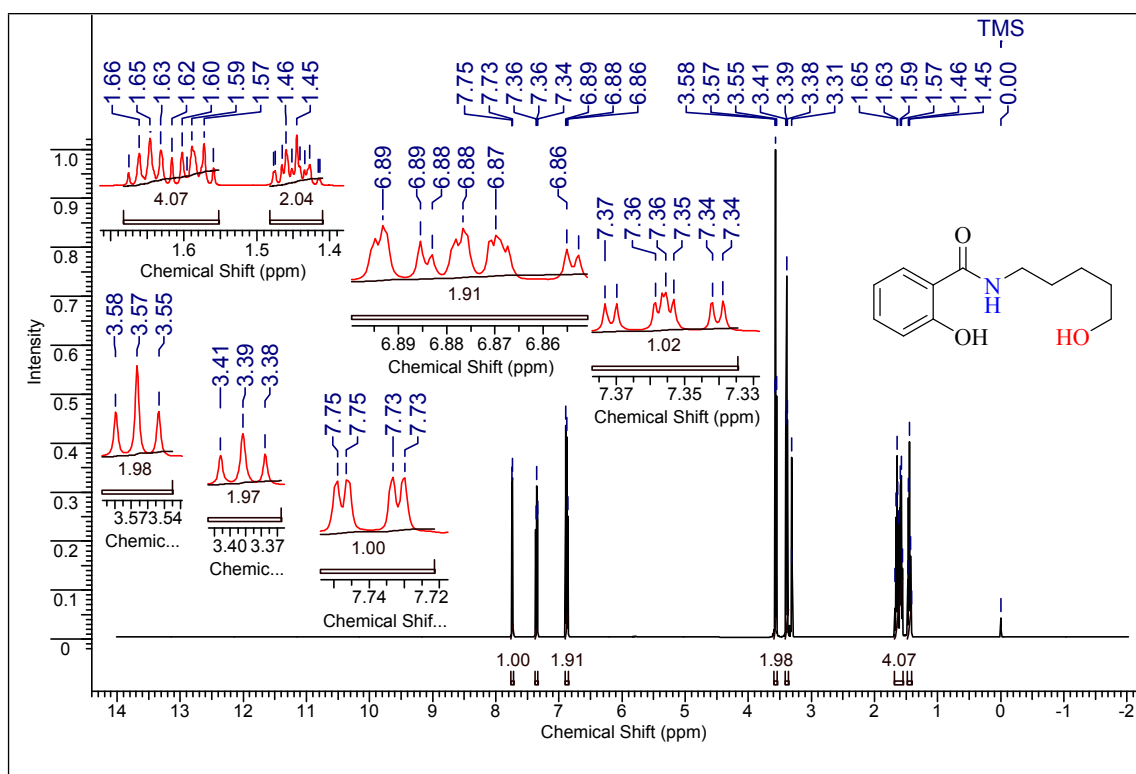

**Figure S14.**  $^1\text{H}$  NMR spectrum (400 MHz,  $\text{CD}_3\text{OD}$ ) of 2-hydroxy-*N*-(5-hydroxypentyl)benzamide (**S-Ac**).

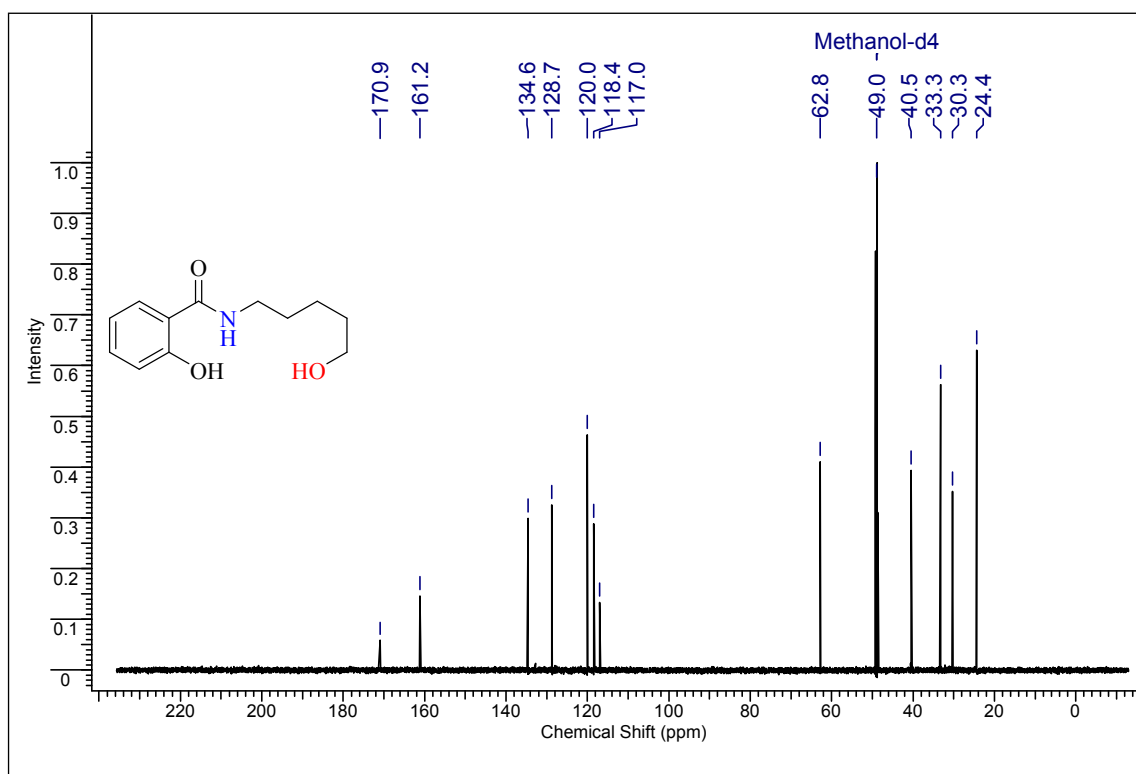

**Figure S15.**  $^{13}\text{C}$  NMR spectrum (127 MHz,  $\text{CD}_3\text{OD}$ ) of 2-hydroxy-*N*-(5-hydroxypentyl)benzamide (**S-Ac**).

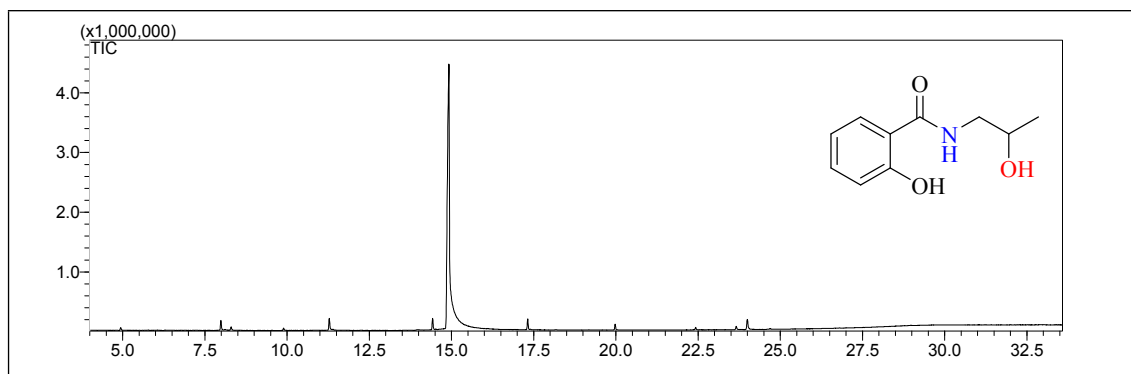

**Figure S16.** Chromatogram obtained by GC-MS (EI, 70 eV) of 2-hydroxy-*N*-(2-hydroxypropyl)benzamide (**S-Ad**).

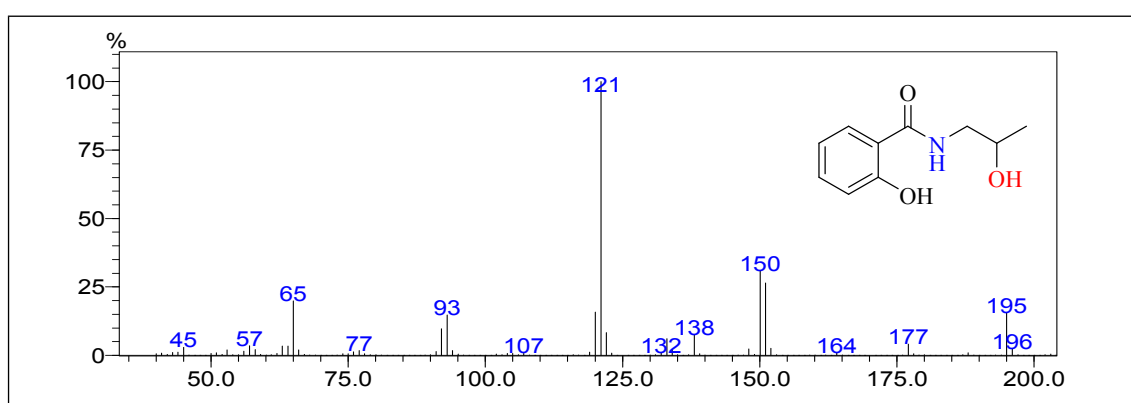

**Figure S17.** Mass spectrum (EI, 70 eV) of 2-hydroxy-*N*-(2-hydroxypropyl)benzamide (**S-Ad**).

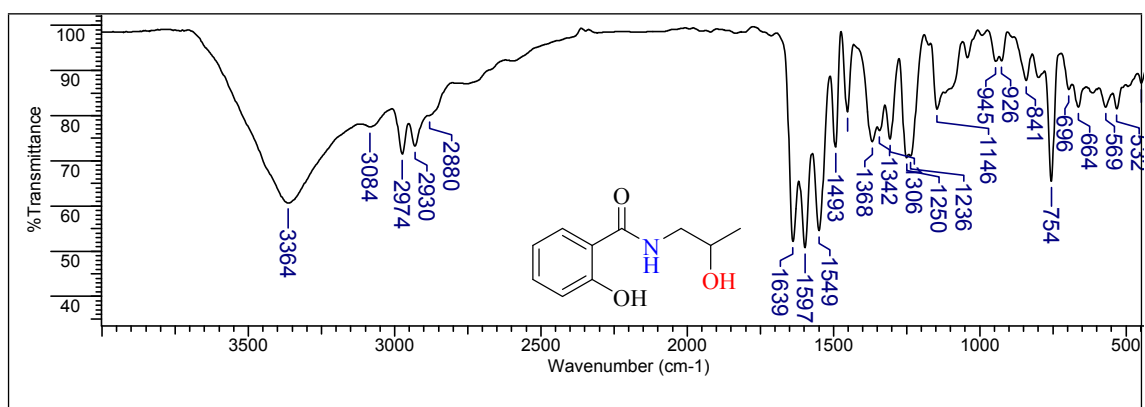

**Figure S18.** FTIR spectrum (Silicon plate) of 2-hydroxy-*N*-(2-hydroxypropyl)benzamide (**S-Ad**).



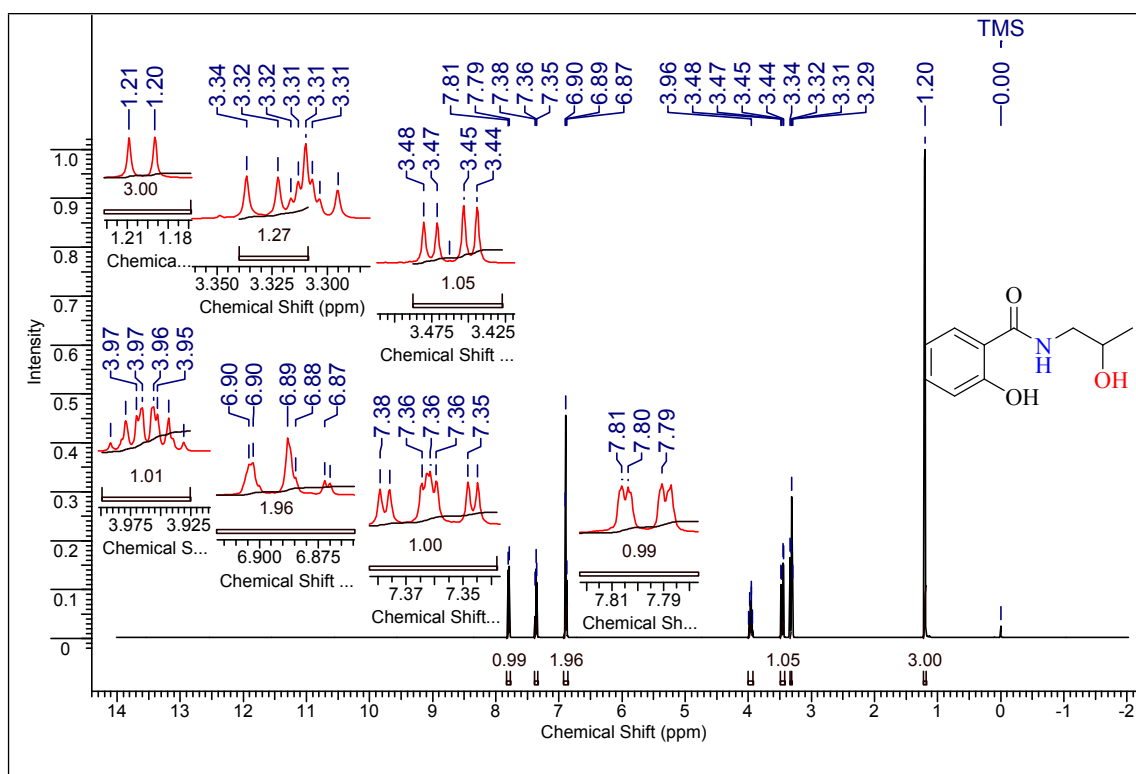

**Figure S19.**  $^1\text{H}$  NMR spectrum (400 MHz,  $\text{CD}_3\text{OD}$ ) of 2-hydroxy-*N*-(2-hydroxypropyl)benzamide (**S-Ad**).

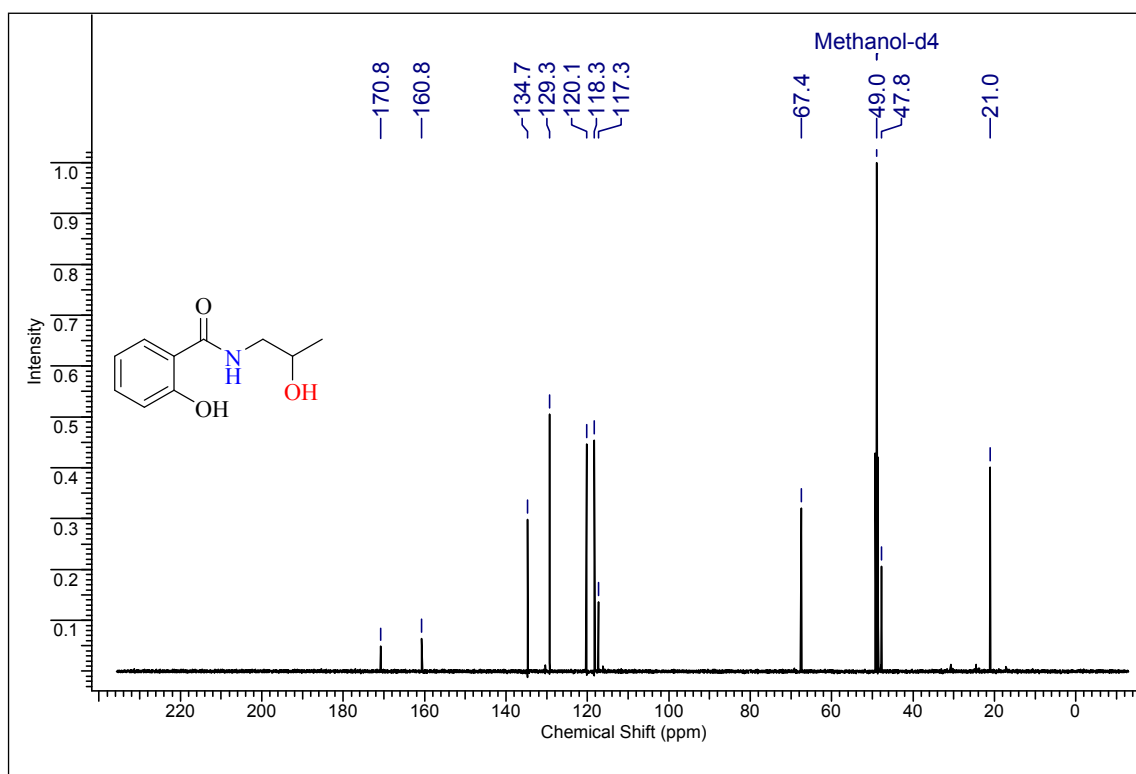

**Figure S20.**  $^{13}\text{C}$  NMR spectrum (127 MHz,  $\text{CD}_3\text{OD}$ ) of 2-hydroxy-*N*-(2-hydroxypropyl)benzamide (**S-Ad**).

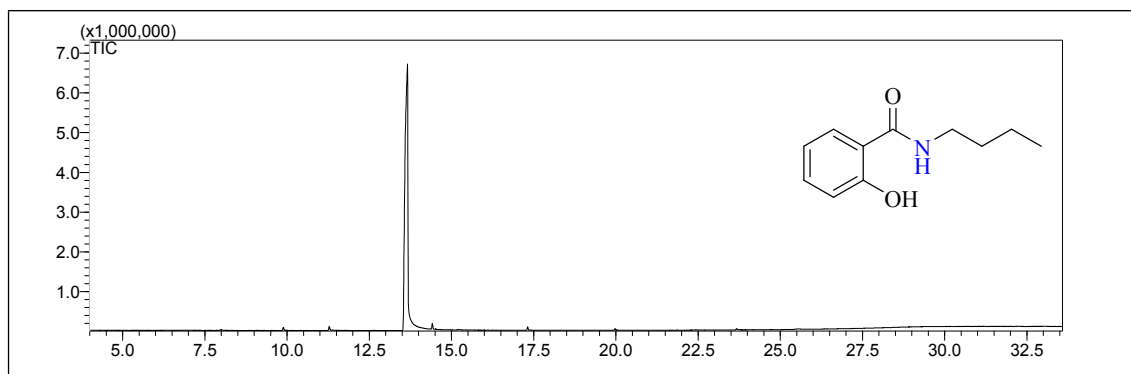

**Figure S21.** Chromatogram obtained by GC-MS (EI, 70 eV) of *N*-butyl-2-hydroxybenzamide (**S-Ae**).

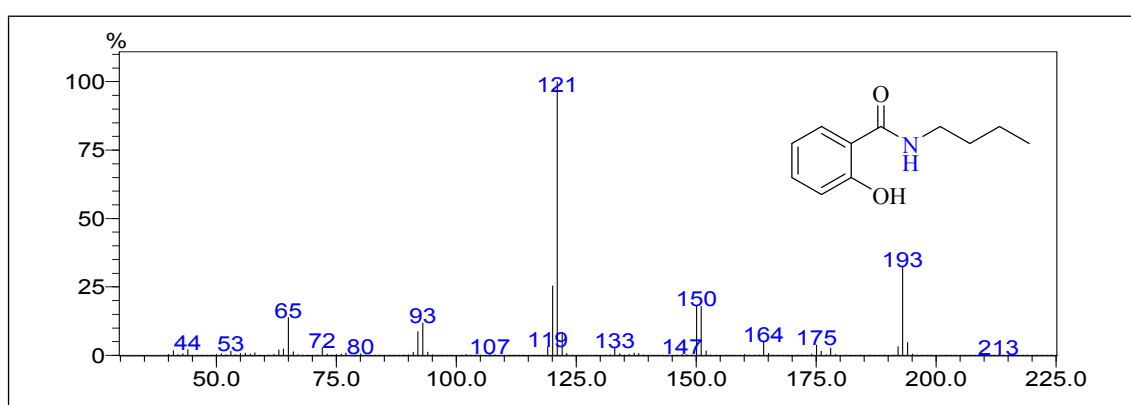

**Figure S22.** Mass spectrum (EI, 70 eV) of *N*-butyl-2-hydroxybenzamide (**S-Ae**).

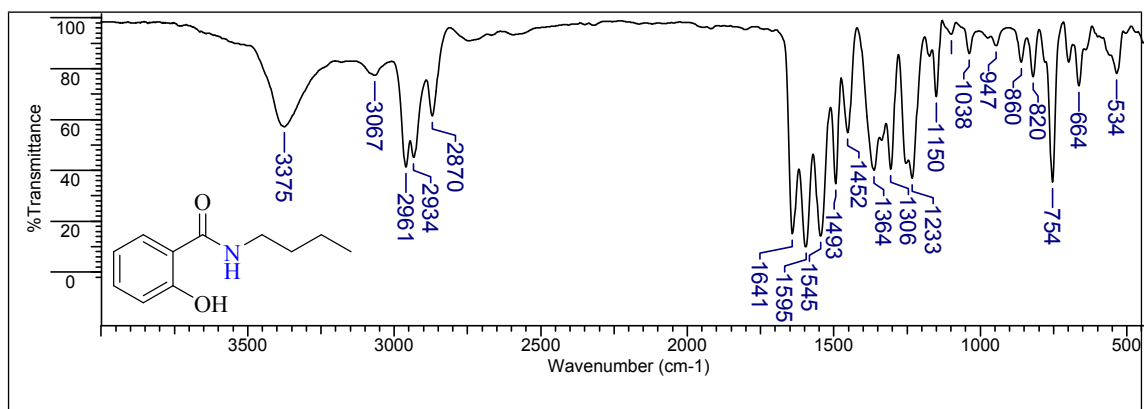

**Figure S23.** FTIR spectrum (Silicon plate) of *N*-butyl-2-hydroxybenzamide (**S-Ae**).

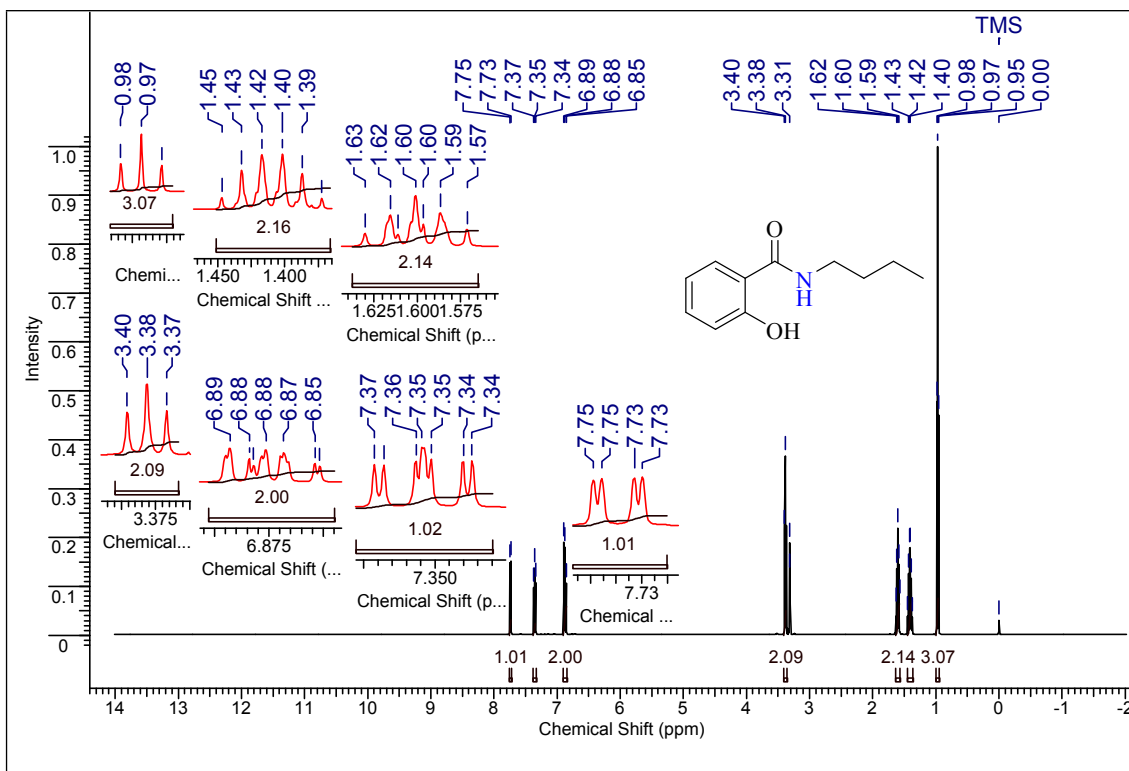

**Figure S24.**  $^1\text{H}$  NMR spectrum (400 MHz,  $\text{CD}_3\text{OD}$ ) of *N*-butyl-2-hydroxybenzamide (**S-Ae**).

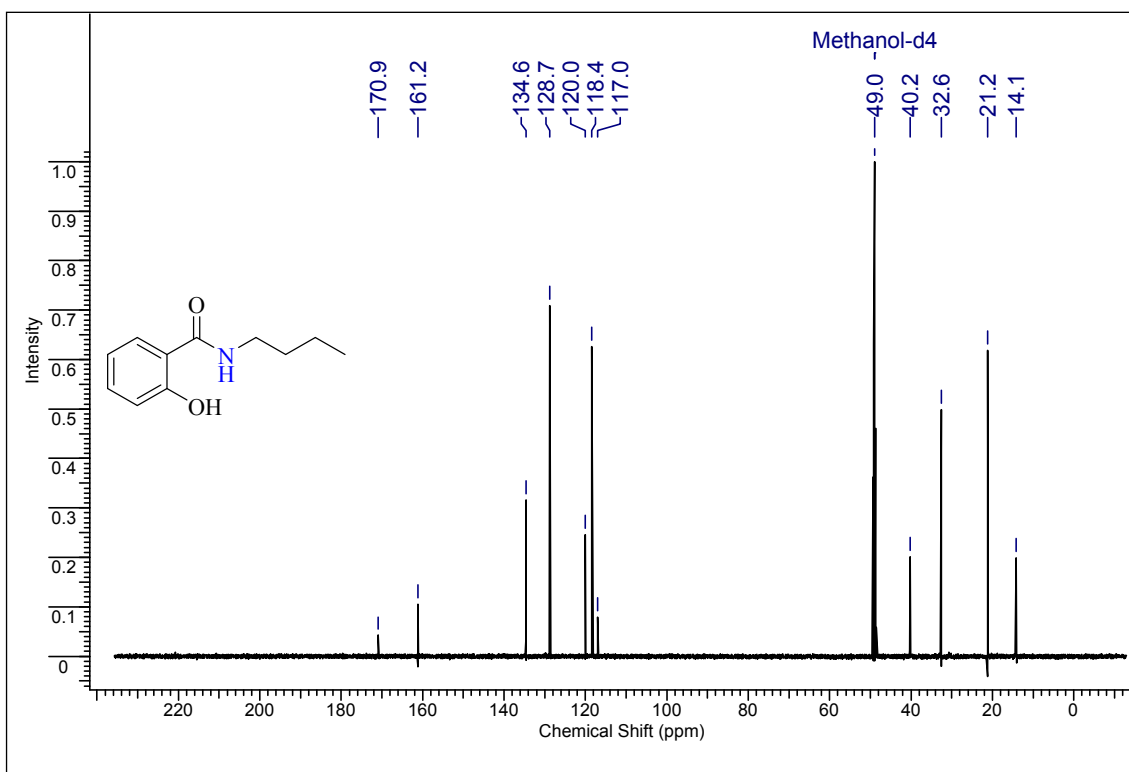

**Figure S25.**  $^{13}\text{C}$  NMR spectrum (127 MHz,  $\text{CD}_3\text{OD}$ ) of *N*-butyl-2-hydroxybenzamide (**S-Ae**).

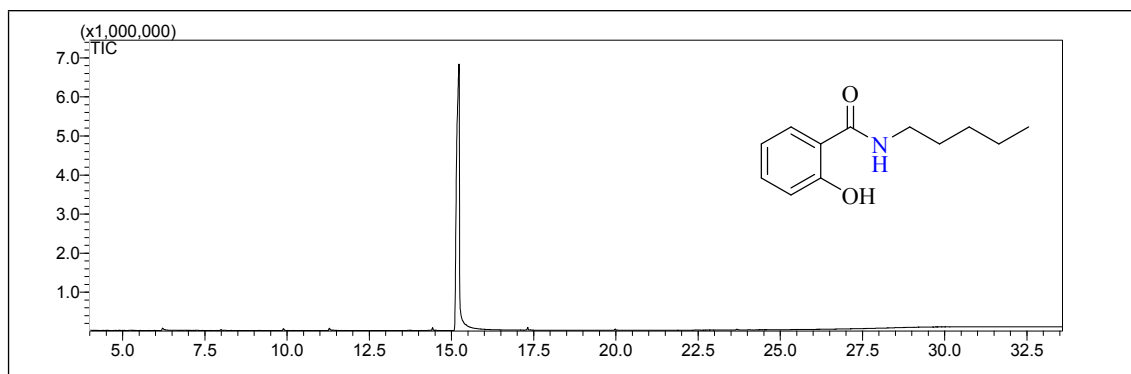

**Figure S26.** Chromatogram obtained by GC-MS (EI, 70 eV) of 2-hydroxy-*N*-pentylbenzamide (**S-Af**).

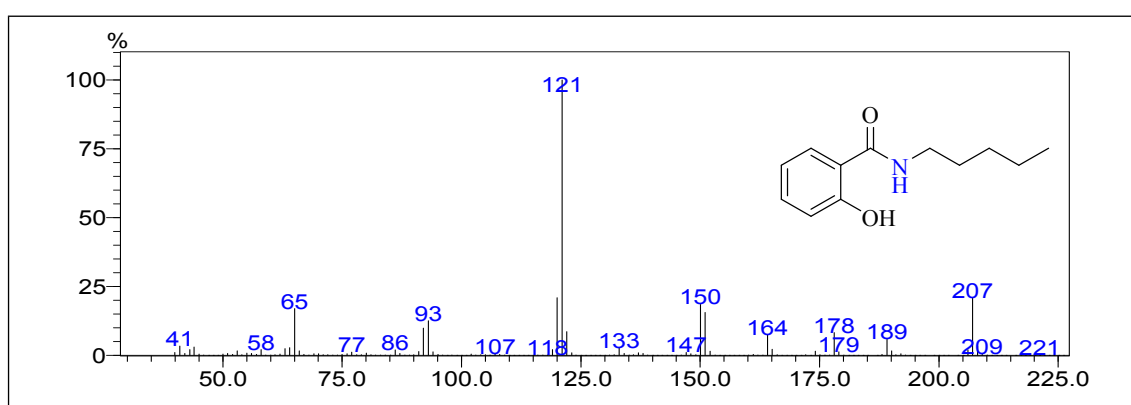

**Figure S27.** Mass spectrum (EI, 70 eV) of 2-hydroxy-*N*-pentylbenzamide (**S-Af**).

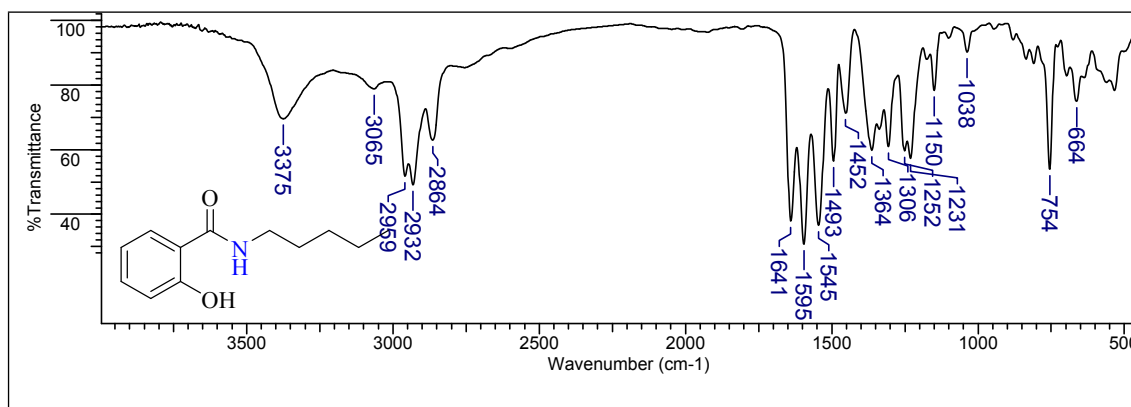

**Figure S28.** FTIR spectrum (Silicon plate) of 2-hydroxy-*N*-pentylbenzamide (**S-Af**).

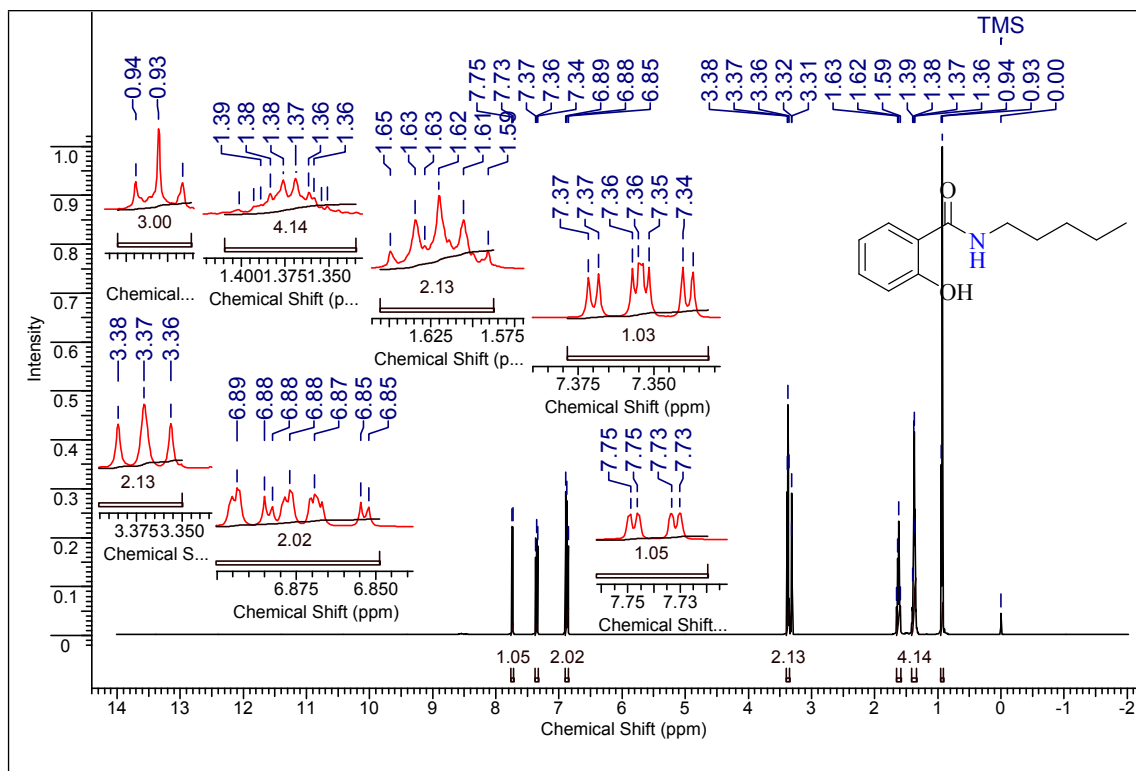

**Figure S29.**  $^1\text{H}$  NMR spectrum (400 MHz,  $\text{CD}_3\text{OD}$ ) of 2-hydroxy-*N*-pentylbenzamide (S-Af).

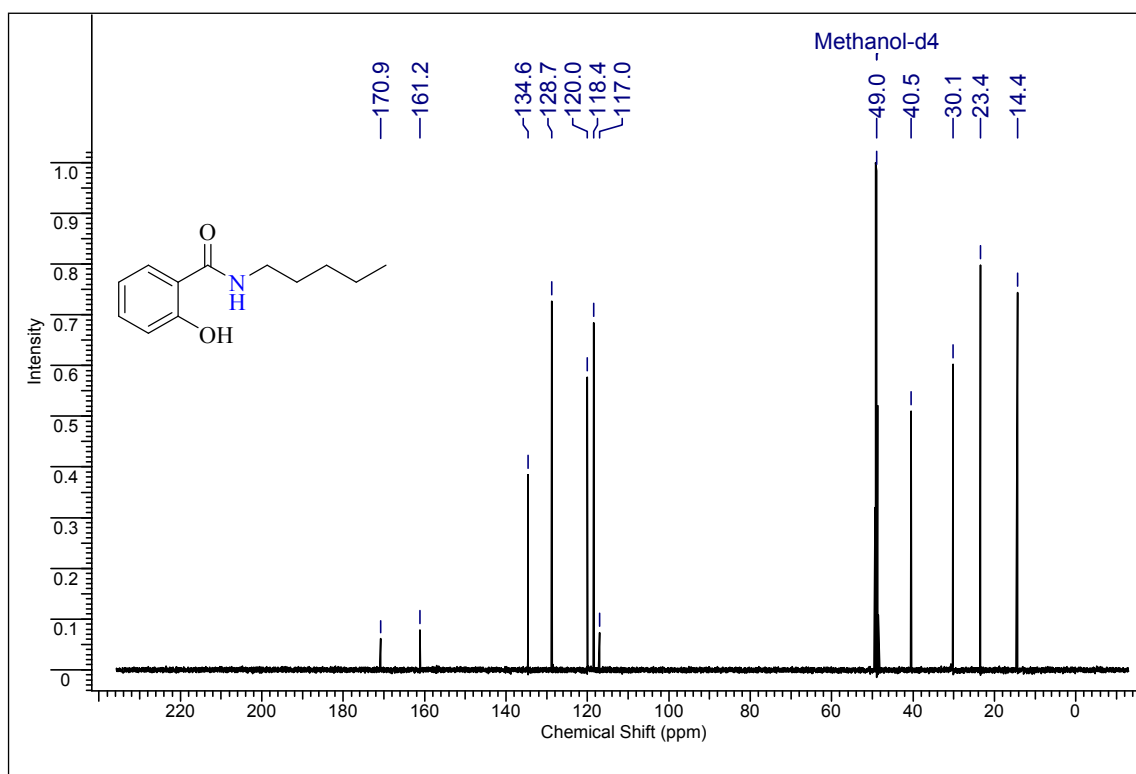

**Figure S30.**  $^{13}\text{C}$  NMR spectrum (127 MHz,  $\text{CD}_3\text{OD}$ ) of 2-hydroxy-*N*-pentylbenzamide (S-Af).

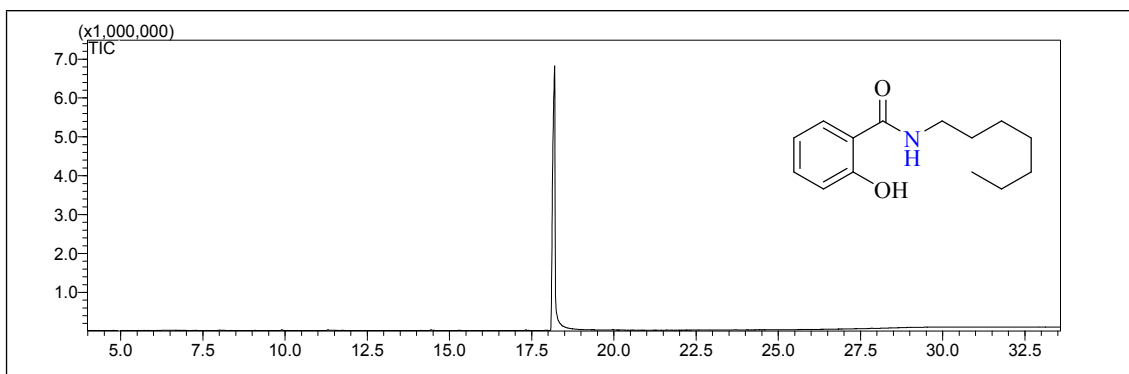

**Figure S31.** Chromatogram obtained by GC-MS (EI, 70 eV) of *N*-heptyl-2-hydroxybenzamide (**S-Ag**).

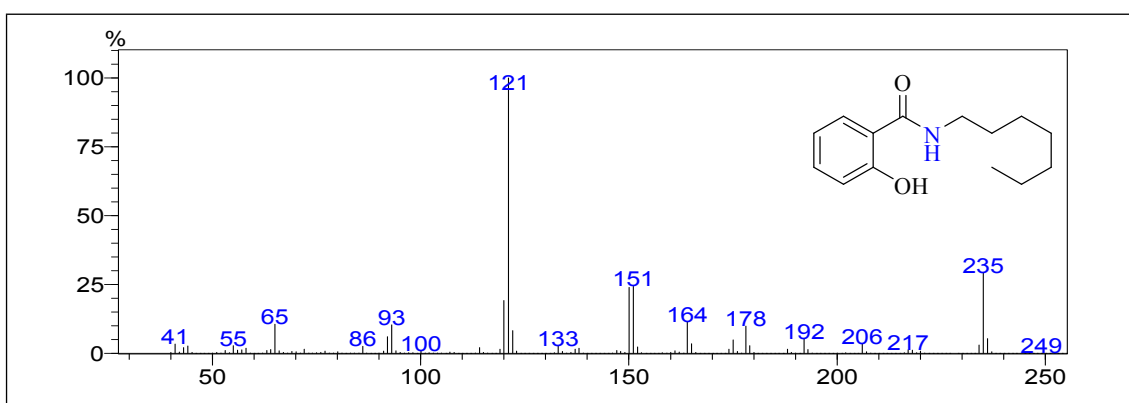

**Figure S32.** Mass spectrum (EI, 70 eV) of *N*-heptyl-2-hydroxybenzamide (**S-Ag**).

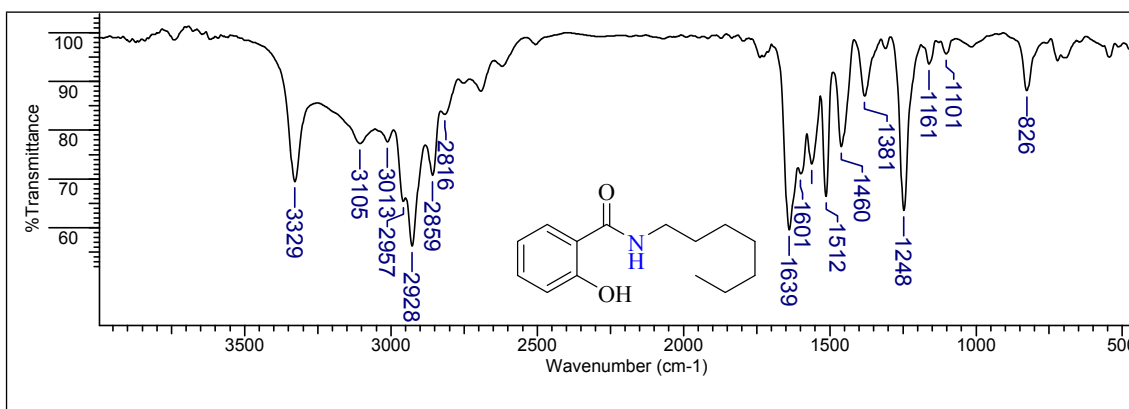

**Figure S33.** FTIR spectrum (Silicon plate) of *N*-heptyl-2-hydroxybenzamide (**S-Ag**).

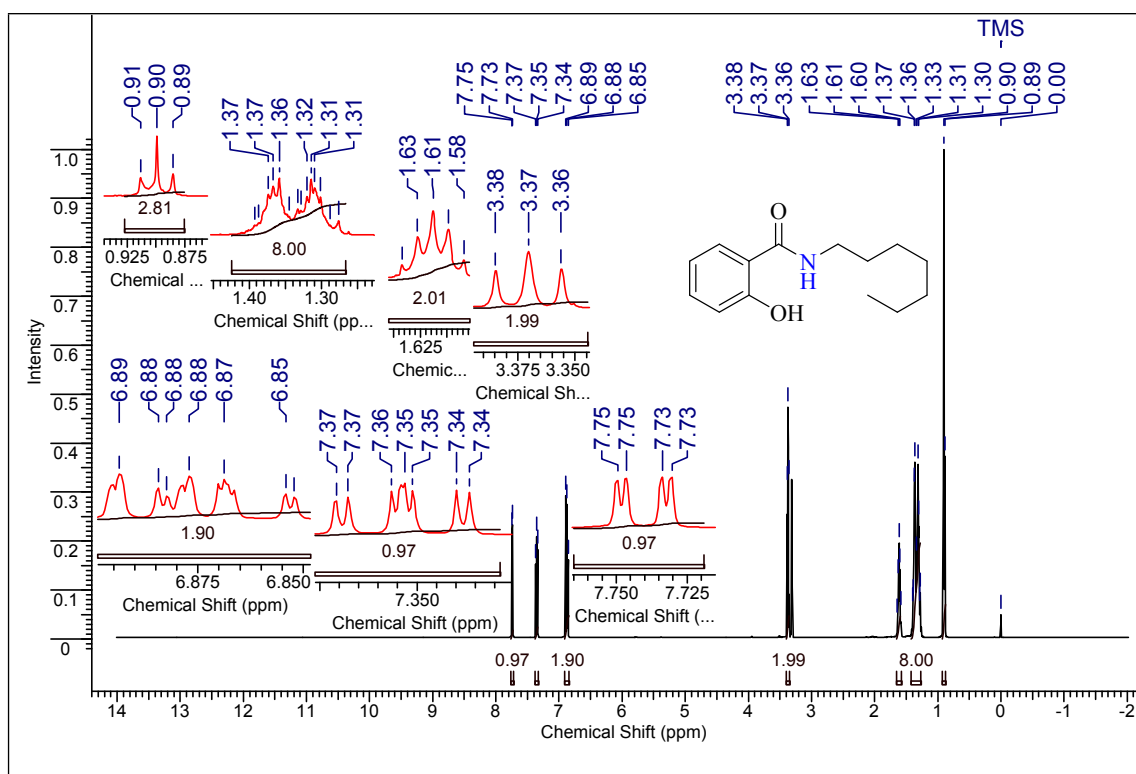

**Figure S34.**  $^1\text{H}$  NMR spectrum (400 MHz,  $\text{CD}_3\text{OD}$ ) of *N*-heptyl-2-hydroxybenzamide (S-Ag).

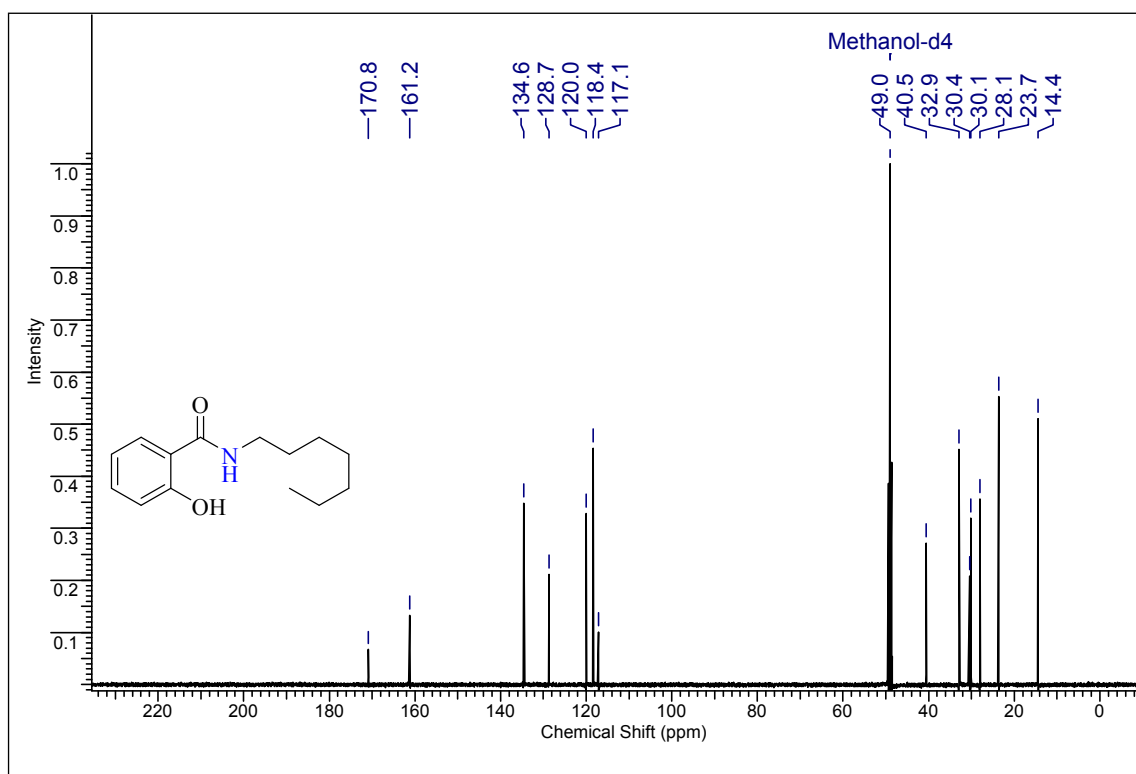

**Figure S35.**  $^{13}\text{C}$  NMR spectrum (127 MHz,  $\text{CD}_3\text{OD}$ ) of *N*-heptyl-2-hydroxybenzamide (S-Ag).

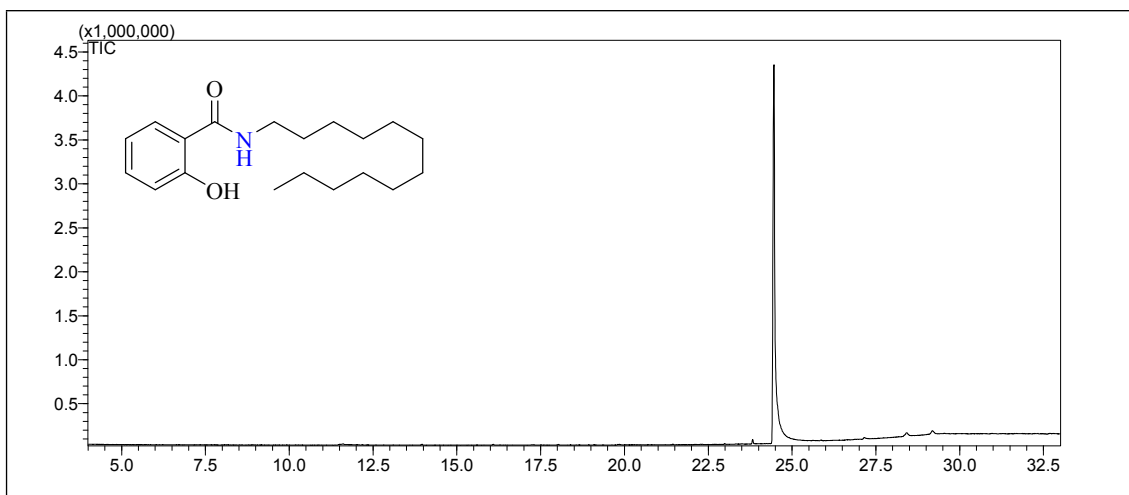

**Figure S36.** Chromatogram obtained by GC-MS (EI, 70 eV) of *N*-dodecyl-2-hydroxybenzamide (**S-Ah**).

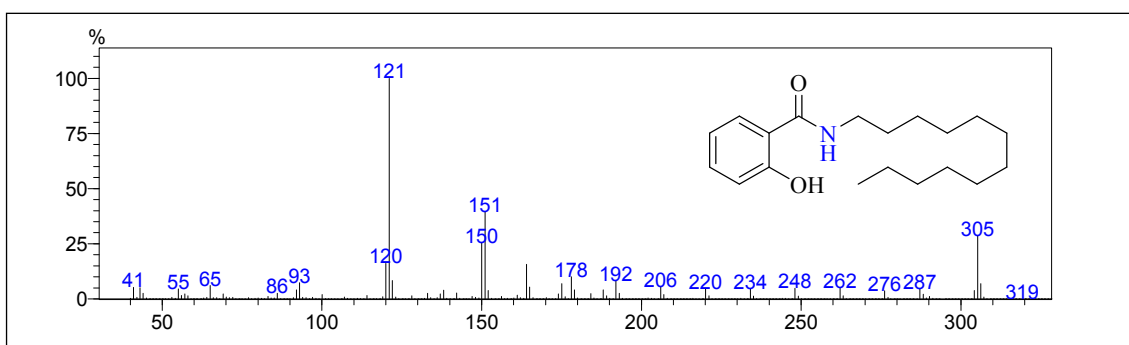

**Figure S37.** Mass spectrum (70 eV) of *N*-dodecyl-2-hydroxybenzamide (**S-Ah**).

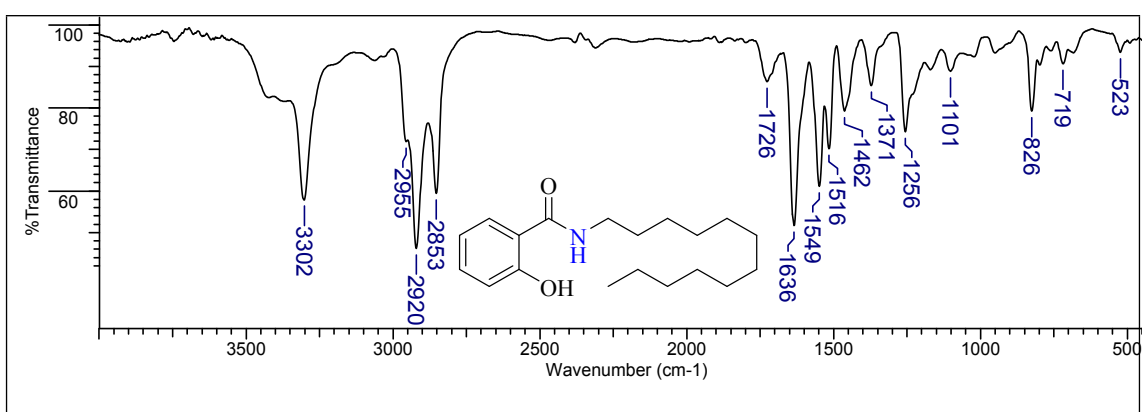

**Figure S38.** FTIR spectrum (Silicon plate) of *N*-dodecyl-2-hydroxybenzamide (**S-Ah**).



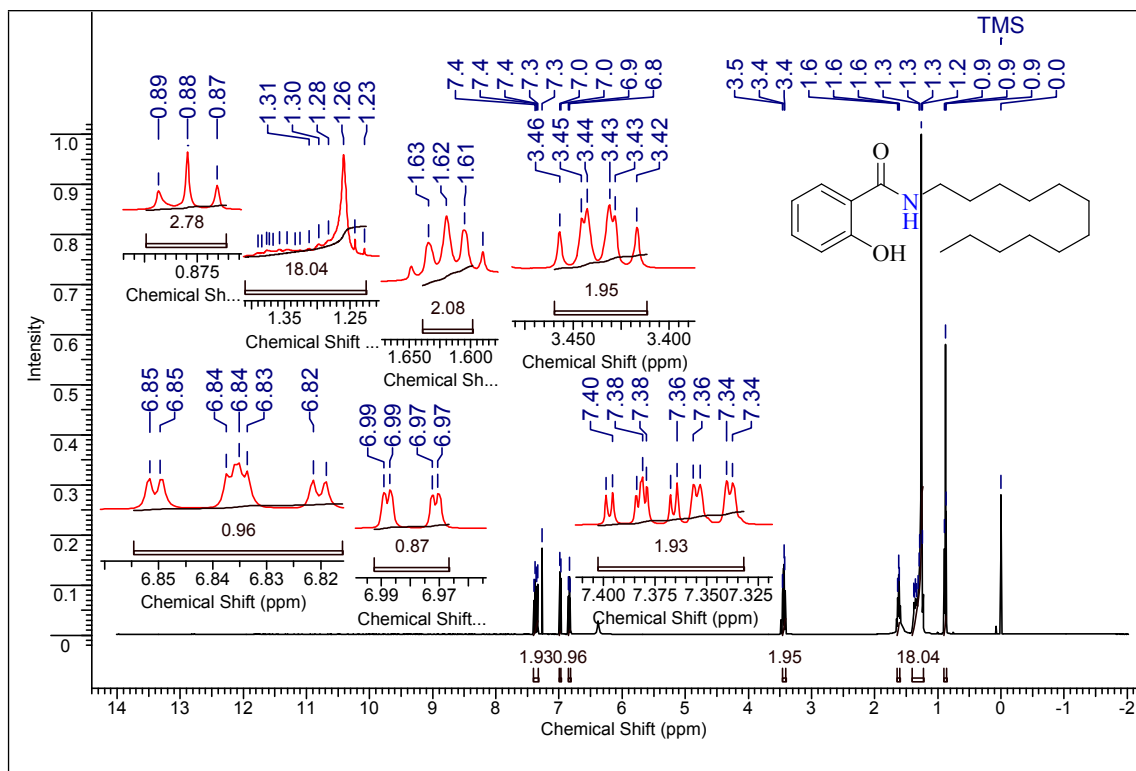

**Figure S39.**  $^1\text{H}$  NMR spectrum (400 MHz,  $\text{CDCl}_3$ ) of *N*-dodecyl-2-hydroxybenzamide (S-Ah).

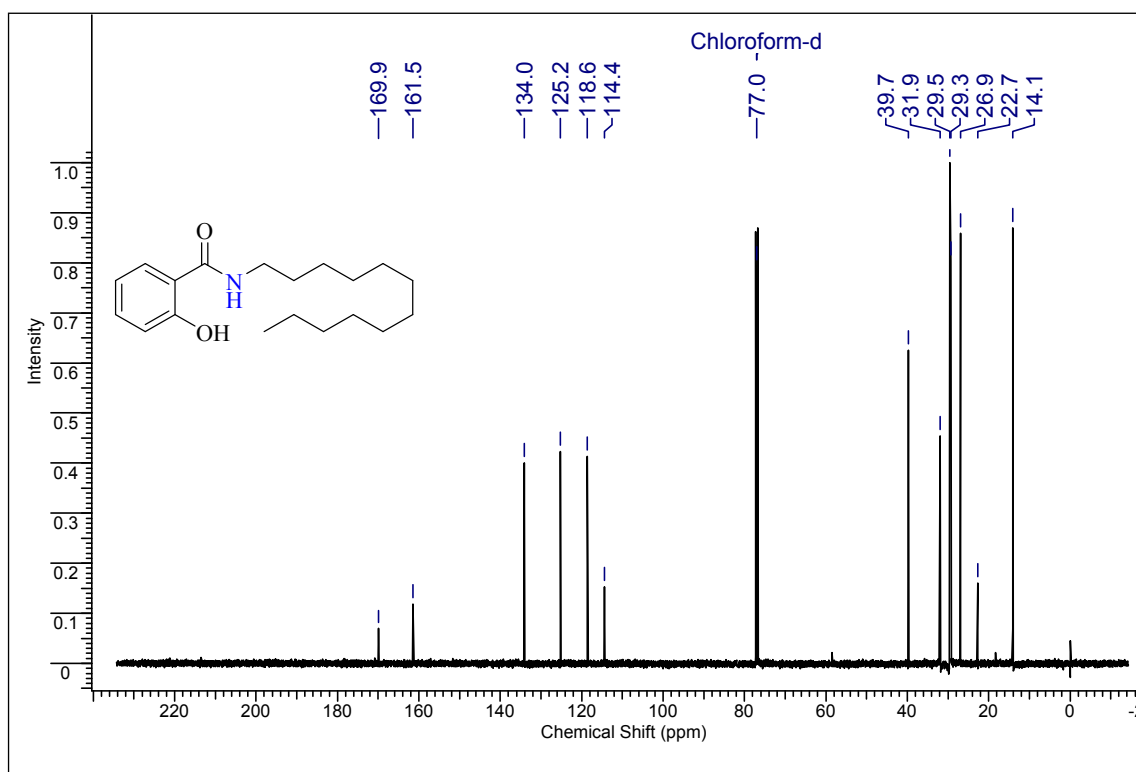

**Figure S40.**  $^{13}\text{C}$  NMR spectrum (127 MHz,  $\text{CDCl}_3$ ) of *N*-dodecyl-2-hydroxybenzamide (S-Ah).

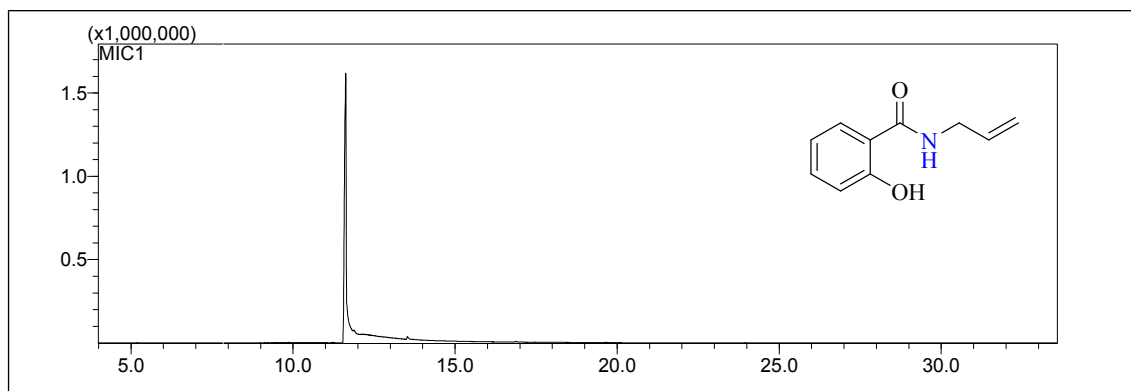

**Figure S41.** Chromatogram obtained by GC-MS (EI, 70 eV) of *N*-allyl-2-hydroxybenzamide (**S-Ai**).

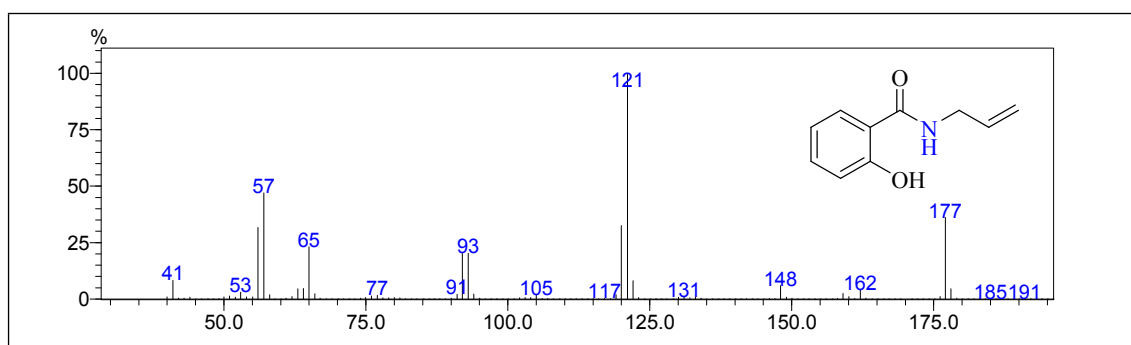

**Figure S42.** Mass spectrum (EI, 70 eV) of *N*-allyl-2-hydroxybenzamide (**S-Ai**).

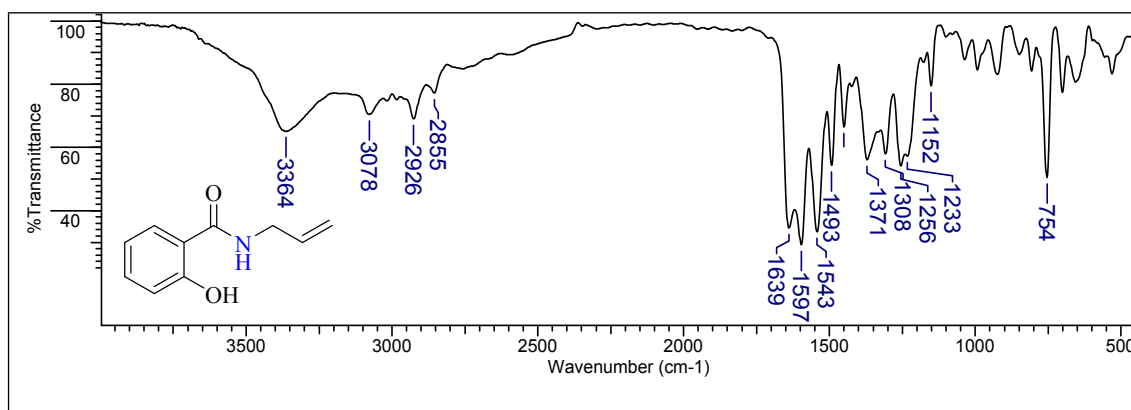

**Figure S43.** FTIR spectrum (Silicon plate) of *N*-allyl-2-hydroxybenzamide (**S-Ai**).

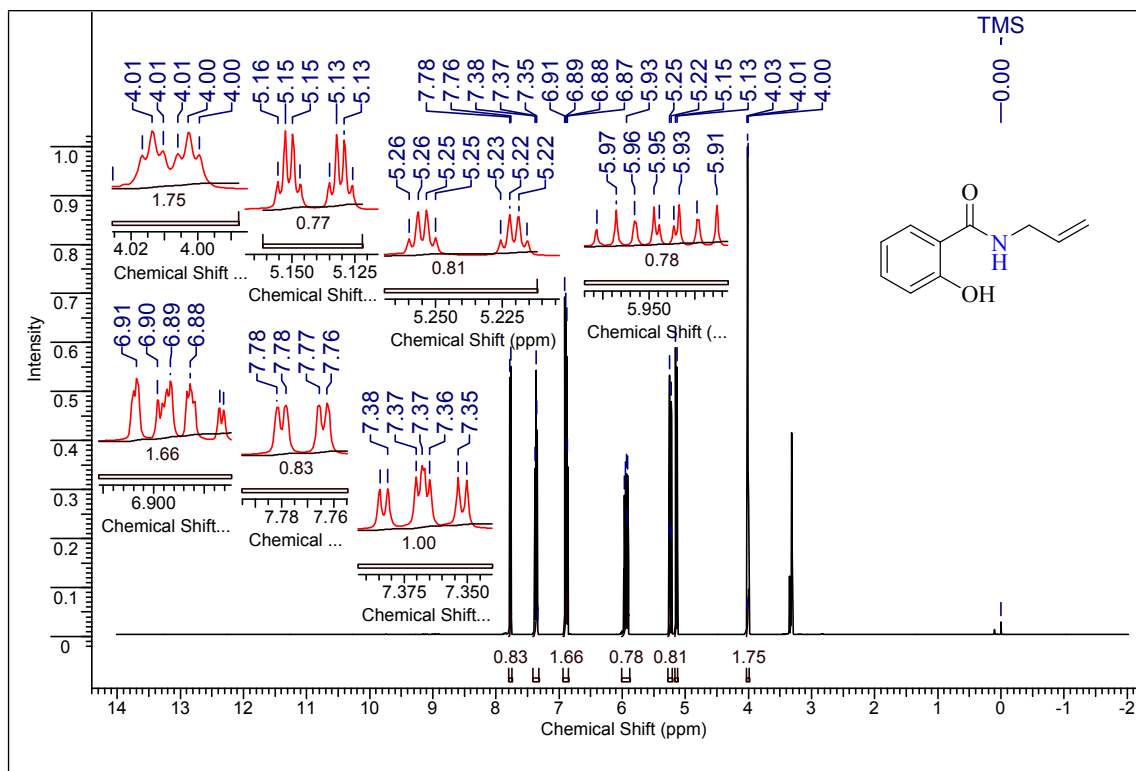

**Figure S44.**  $^1\text{H}$  NMR spectrum (400 MHz,  $\text{CD}_3\text{OD}$ ) of *N*-allyl-2-hydroxybenzamide (S-Ai).

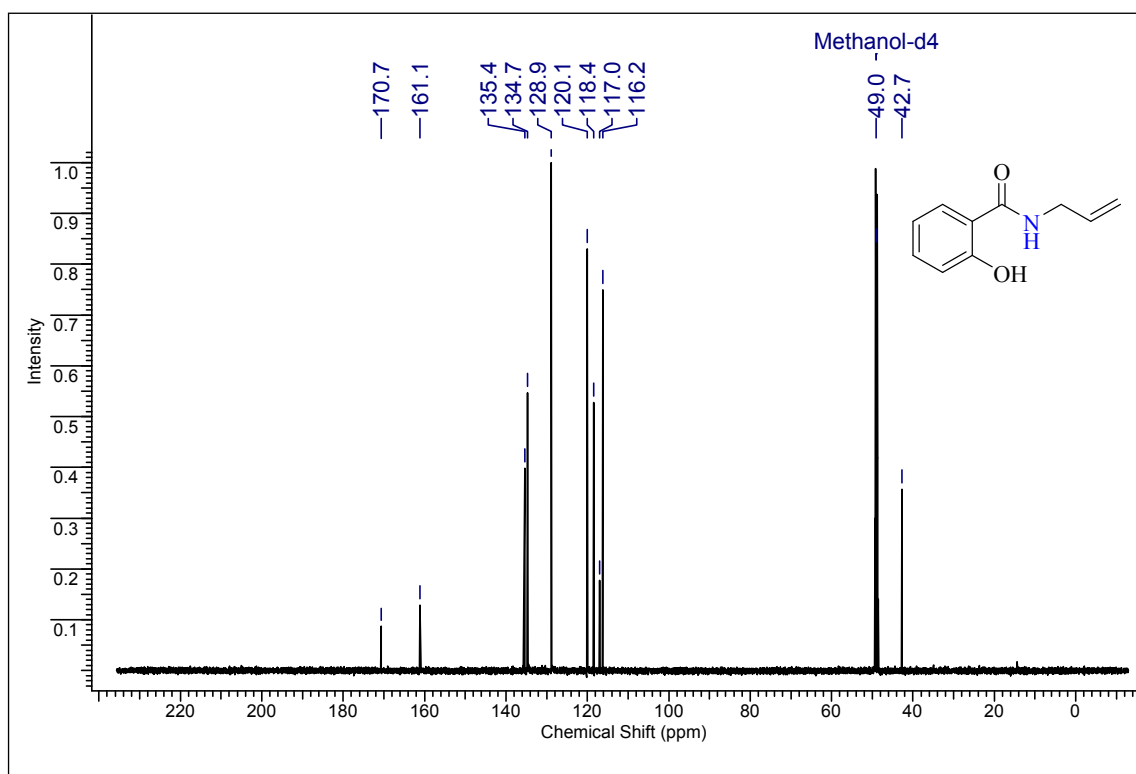

**Figure S45.**  $^{13}\text{C}$  NMR spectrum (127 MHz,  $\text{CD}_3\text{OD}$ ) of *N*-allyl-2-hydroxybenzamide (S-Ai).

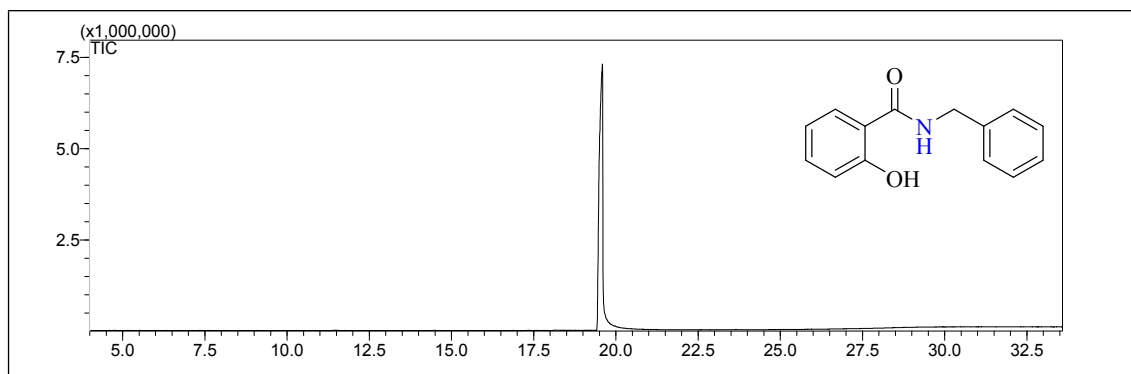

**Figure S46.** Chromatogram obtained by GC-MS (EI, 70 eV) of *N*-benzyl-2-hydroxybenzamide (**S-Aj**).

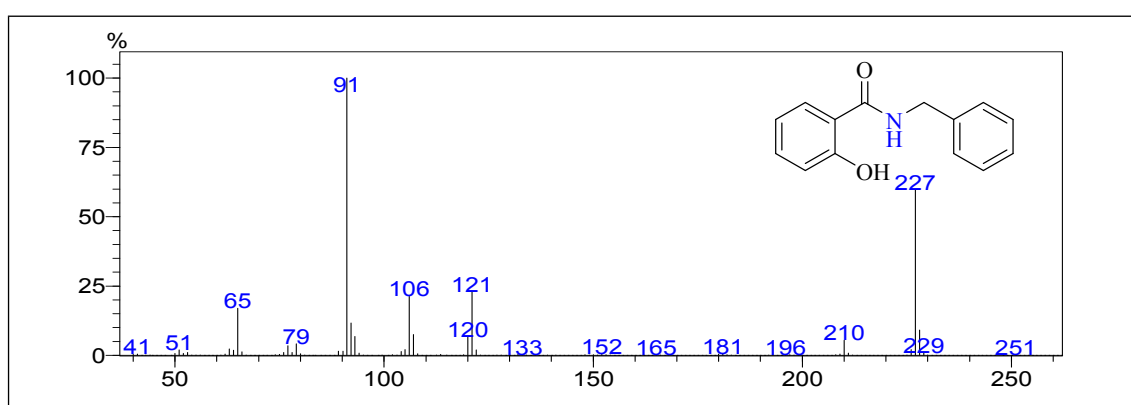

**Figure S47.** Mass spectrum (EI, 70 eV) of *N*-benzyl-2-hydroxybenzamide (**S-Aj**).

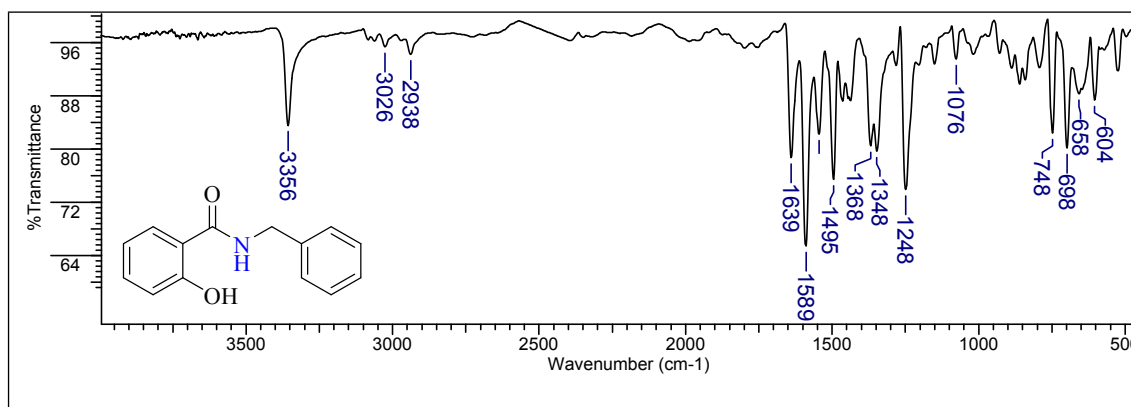

**Figure S48.** FTIR spectrum (Silicon plate) of *N*-benzyl-2-hydroxybenzamide (**S-Aj**).

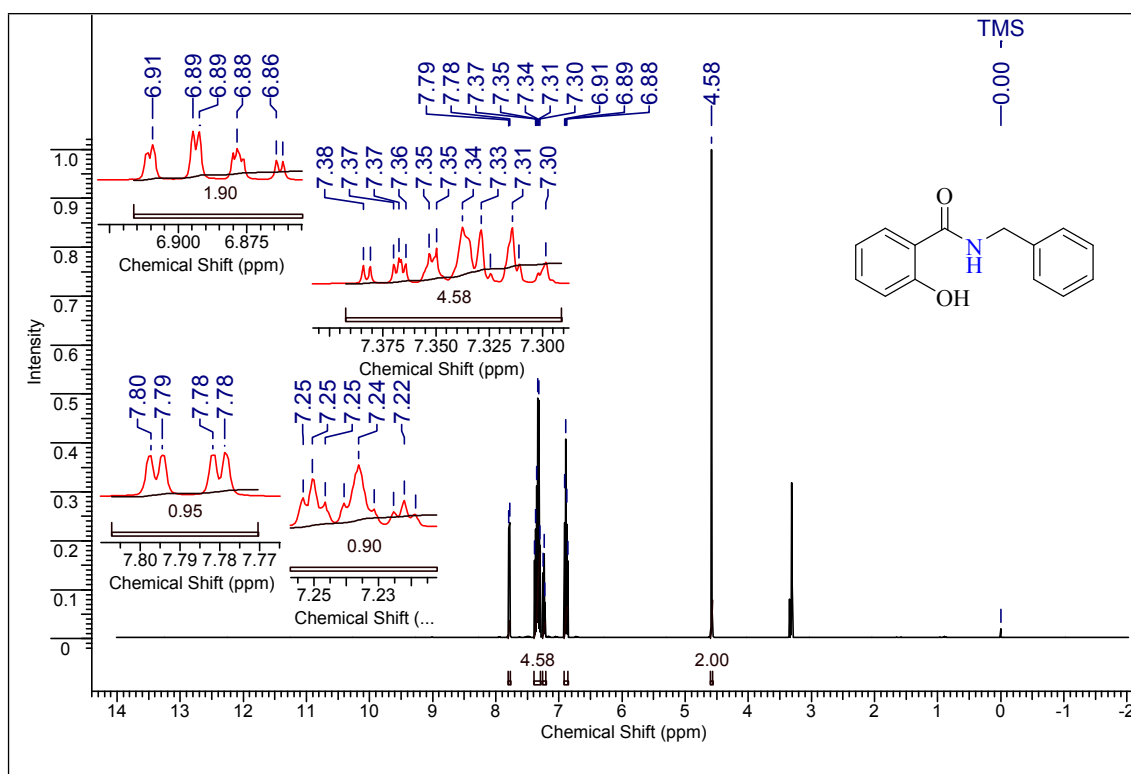

**Figure S49.**  $^1\text{H}$  NMR spectrum (400 MHz,  $\text{CD}_3\text{OD}$ ) of *N*-benzyl-2-hydroxybenzamide (S-Aj).

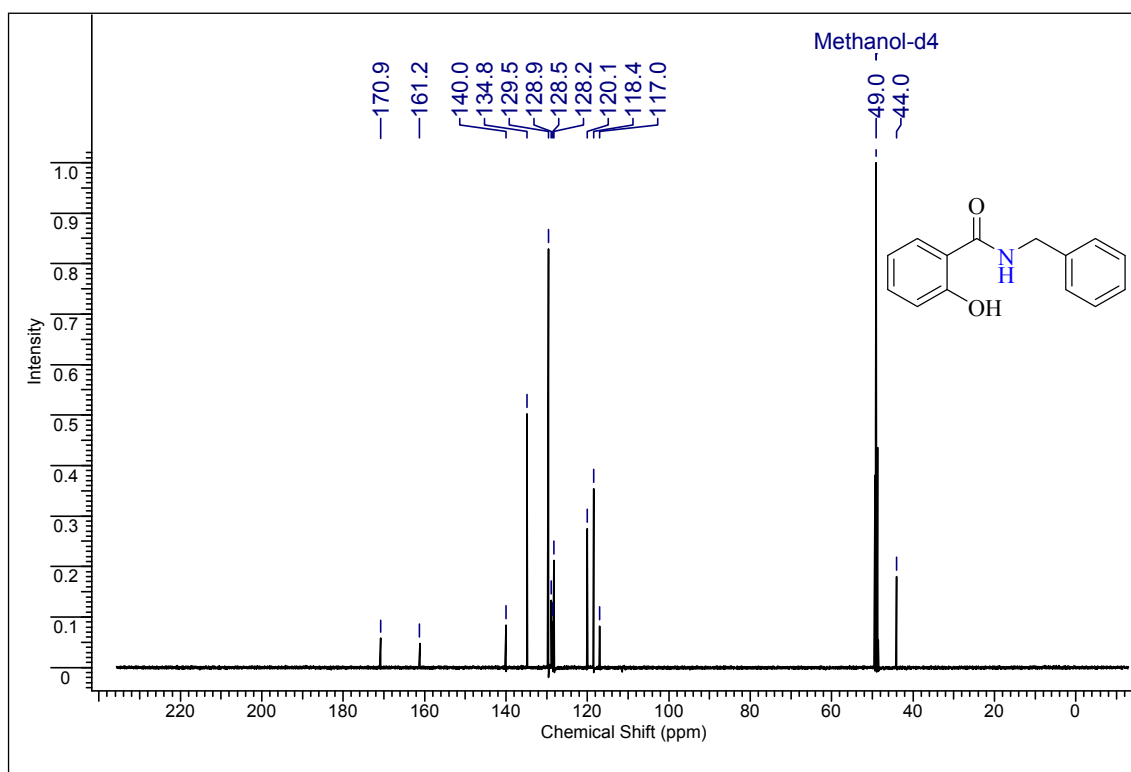

**Figure S50.**  $^{13}\text{C}$  NMR spectrum (127 MHz,  $\text{CD}_3\text{OD}$ ) of *N*-benzyl-2-hydroxybenzamide (S-Aj).

2. Analytical curve of ethyl salicylate ES used to calculate the conversion of amide

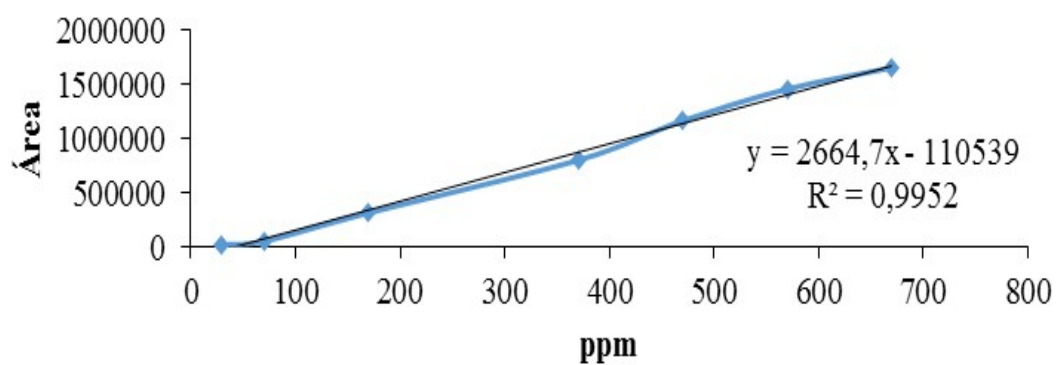

**Figura S51.** Analytical curve of ethyl salicylate used to calculate the conversion of amide.
